# Supplementary material for: Cancer co-opts differentiation of B-cell precursors into macrophage-like cells
Source: PubMed Central journal article supplement (PMC9474882; doi:10.1038/s41467-022-33117-y), 2022-09-14
Supplement: 41467_2022_33117_MOESM1_ESM.pdf [file 41467_2022_33117_MOESM1_ESM.pdf]

**SUPPLEMENTARY FIGURES**

Chen C, et al. “Cancer coopts differentiation of B-cell precursors into macrophage-like cells”

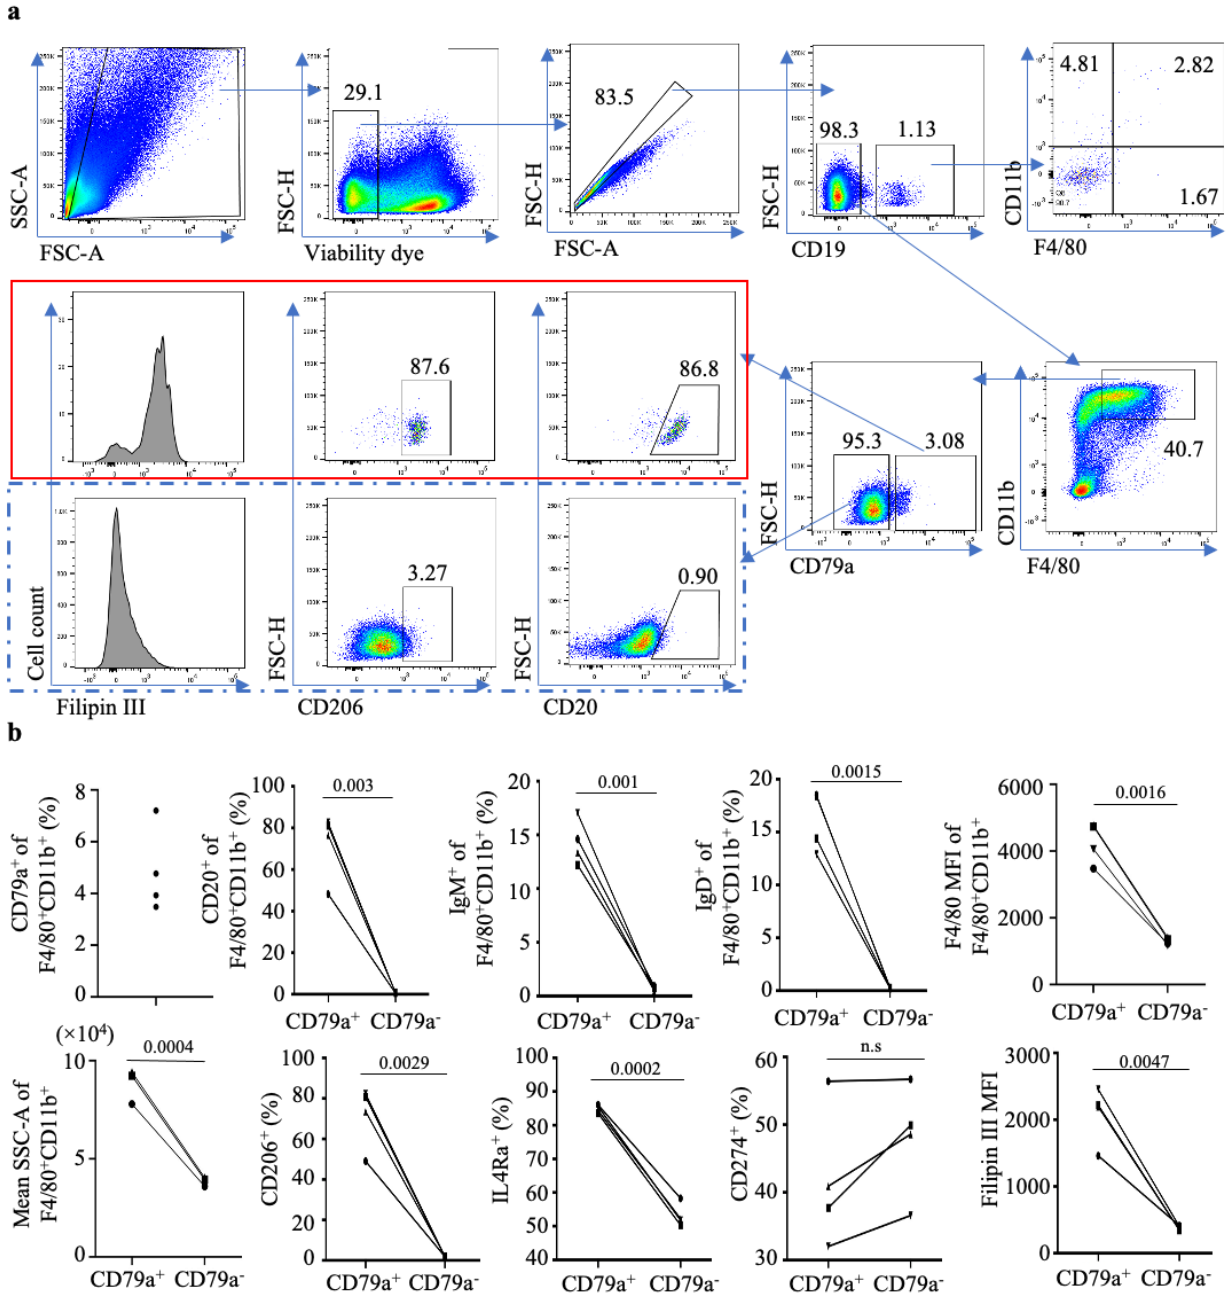

Suppl. Fig.1

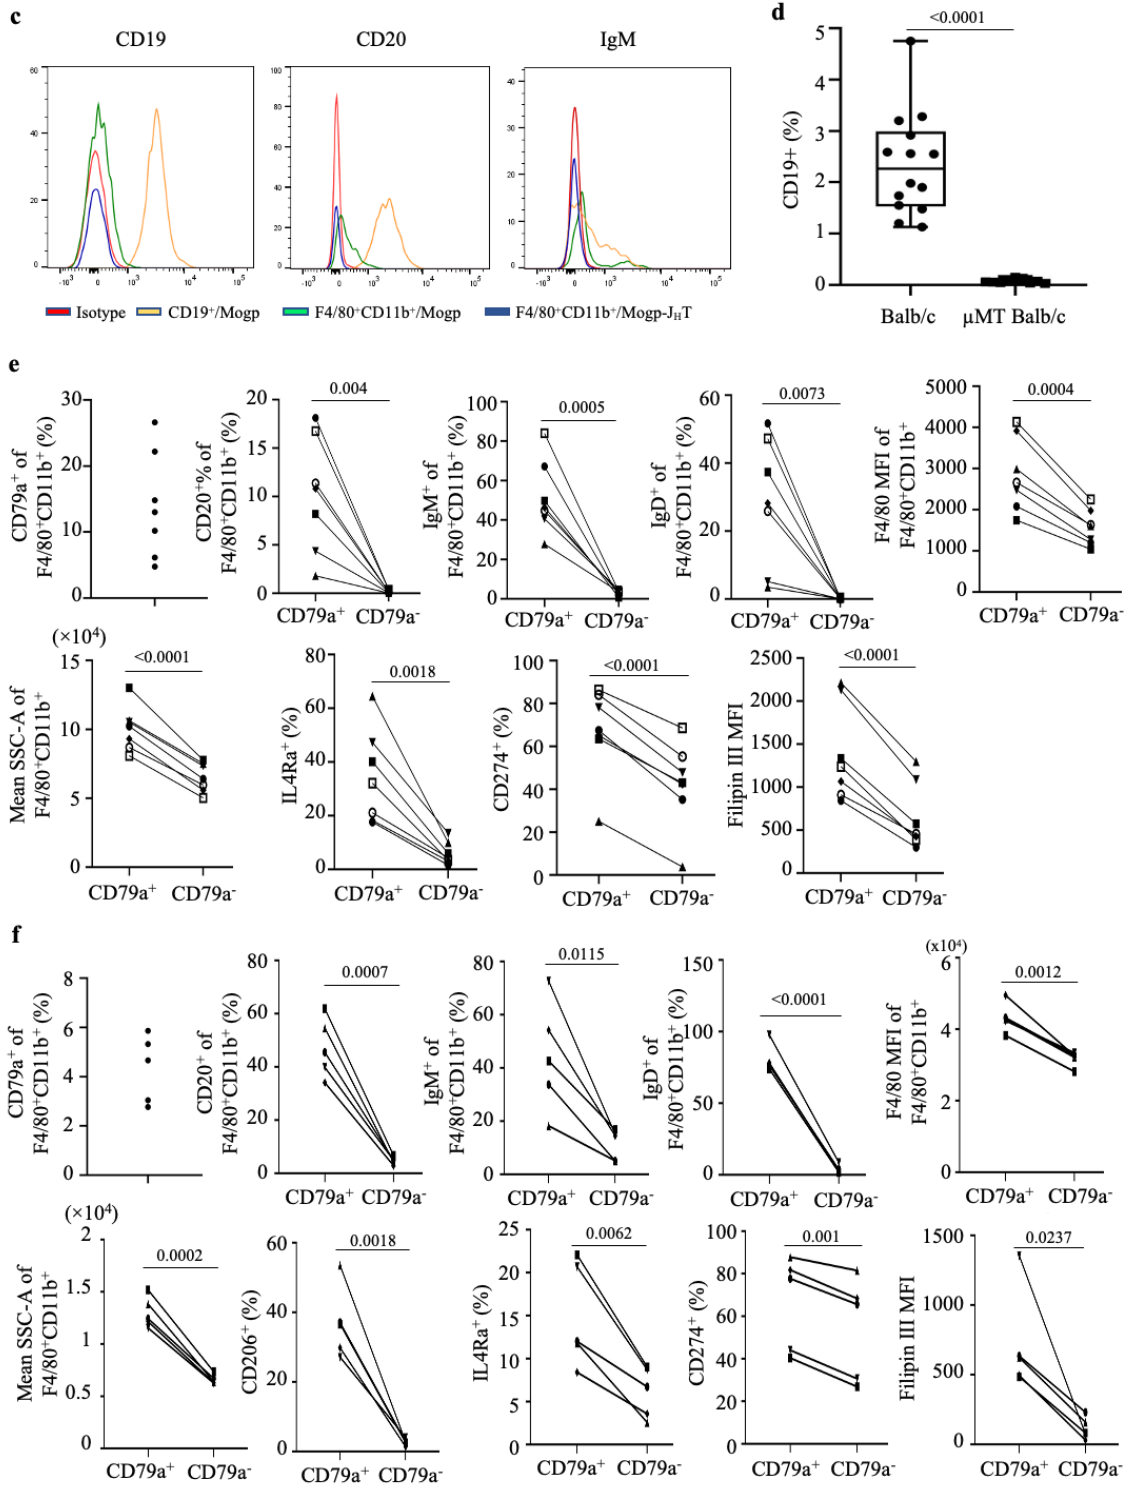

Suppl. Fig.1

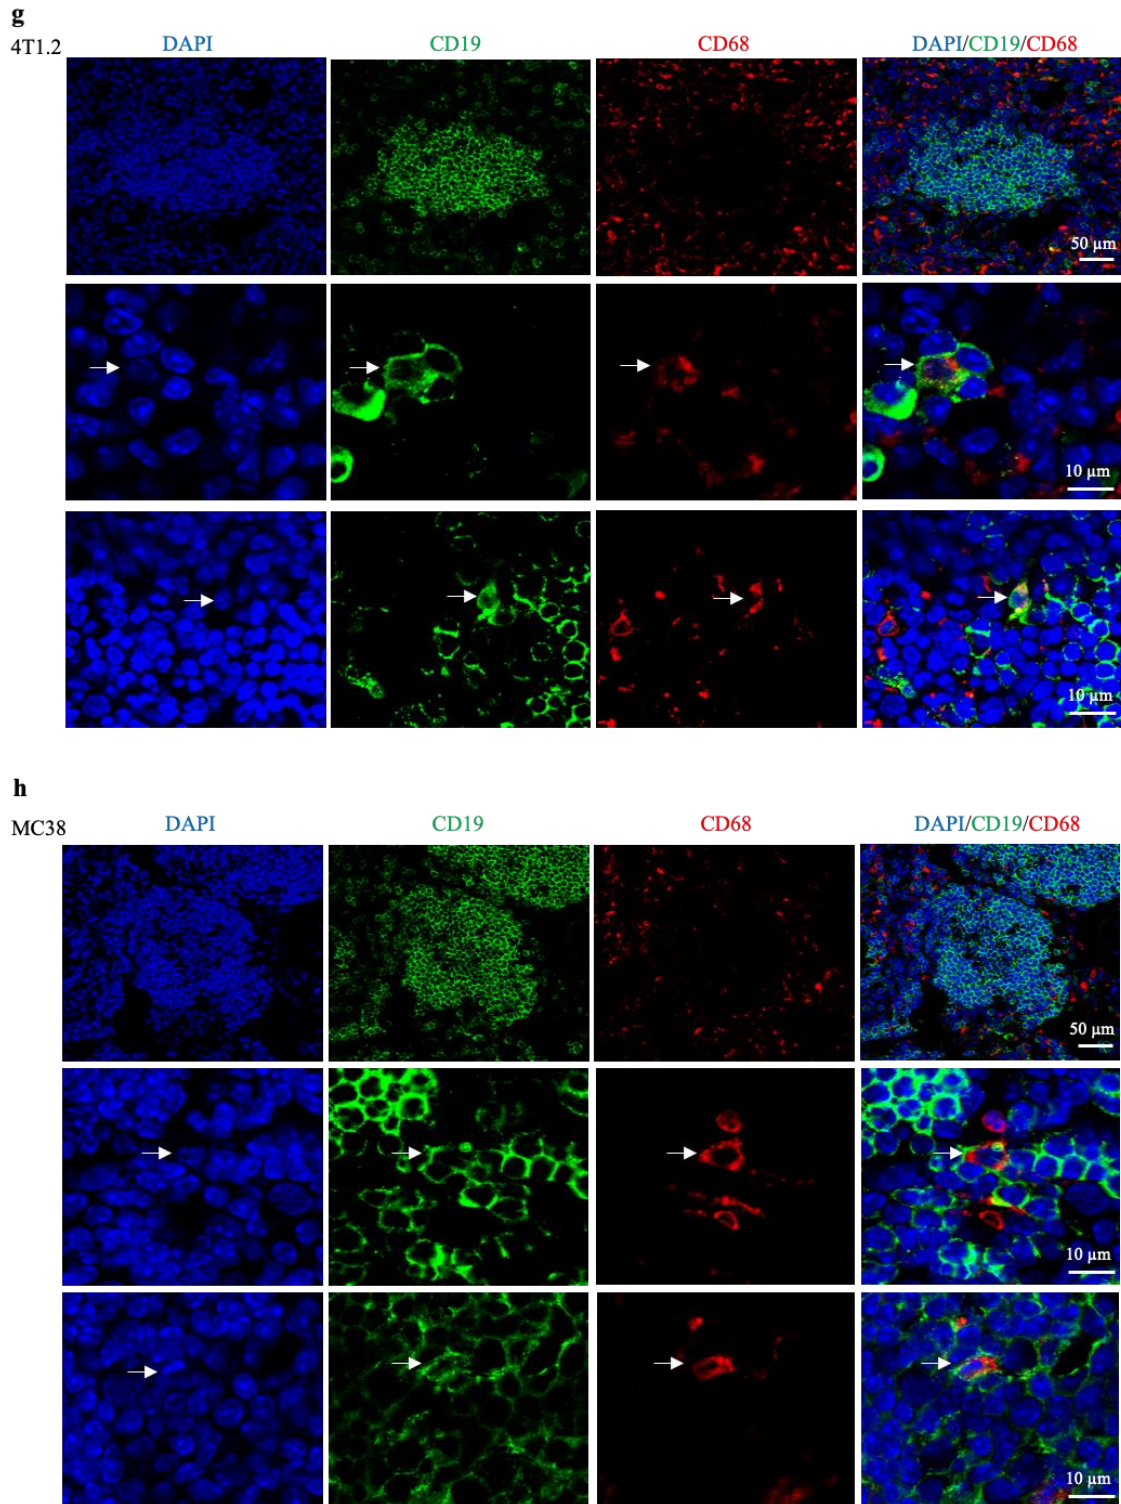

**Supplementary Figure 1. Co-expression of B-cell and macrophage specific markers. a,** gating strategy showing co-expression of B-cell specific markers (CD19, CD79a, CD20) and macrophage markers (F4/80 and CD11b) in TIB and TAM in the tumor from BALB/c mice with s.c. 4T1.2 cancer. **b,** Representative FACS profiling data of surface markers in CD79a<sup>+</sup>

TAM (presumably B-MF) as compared with CD79a<sup>-</sup> TAM (“classic” TAM) in in the tumor of mice with 4T1.2 breast cancer (n=4). (CD20<sup>+</sup>  $P=0.0003$ , IgM<sup>+</sup>  $P=0.0001$ , IgD<sup>+</sup>  $P=0.0015$ , F4/80 MFI  $P=0.0016$ , Mean SSC-A  $P=0.0004$ , CD206<sup>+</sup>  $P=0.0029$ , IL4Ra<sup>+</sup>  $P=0.0002$ , Filipin III MFI  $P=0.0047$  in CD79a<sup>+</sup> vs CD79a<sup>-</sup>).  $P$  values were calculated using two-tailed paired  $t$  test. **c**, Representative histogram showing B-cell specific makers (CD19, CD20 and IgM) within TAM (F4/80<sup>+</sup>CD11b<sup>+</sup>) in the peritoneum of B-cell sufficient (Mogp) and B-cell deficient (Mogp-J<sub>H</sub>T) C57BL/6 mice with peritoneal Mogp ovarian cancer. **d**, Box-Whiskers plot quantification of tumor infiltrated CD19<sup>+</sup> TIB frequency from B-cell sufficient (BALB/c) vs B-cell deficient ( $\mu$ MT BALB/c) mice with 4T1.2 cancer (n=14 for BALB/c group, n=9 for  $\mu$ MT BALB/c group,  $P<0.0001$ ).  $P$  values were calculated using two-tailed unpaired  $t$  test. Representative FACS profiling data of surface markers in CD79a<sup>+</sup> TAM as compared with CD79a<sup>-</sup> TAM in Mogp mice (n=7, CD20<sup>+</sup>  $P=0.0004$ , IgM<sup>+</sup>  $P=0.0005$ , IgD<sup>+</sup>  $P=0.0073$ , F4/80 MFI  $P=0.0004$ , Mean SSC-A  $P<0.0001$ , IL4Ra<sup>+</sup>  $P=0.0018$ , CD274<sup>+</sup>  $P<0.0001$ , Filipin III MFI  $P<0.0001$  in CD79a<sup>+</sup> vs CD79a<sup>-</sup>, **e**) and C57BL/6 mice with MC-38 cancers (n=5, CD20<sup>+</sup>  $P=0.0007$ , IgM<sup>+</sup>  $P=0.0115$ , IgD<sup>+</sup>  $P<0.0001$ , F4/80 MFI  $P=0.0012$ , Mean SSC-A  $P=0.0002$ , CD206<sup>+</sup>  $P=0.0018$ , IL4Ra<sup>+</sup>  $P=0.0062$ , CD274<sup>+</sup>  $P=0.0001$ , Filipin III MFI  $P=0.0237$  in CD79a<sup>+</sup> vs CD79a<sup>-</sup>, **f**).  $P$  values were calculated using two-tailed paired  $t$  test. Representative immunohistochemistry staining for B cells (CD19) and macrophages (CD68) in the tumor of BALB/c and C57BL/6 mice with s.c. 4T1.2 cancer (**g**) and MC38 colon cancer (**h**), respectively. White arrow shows CD19<sup>+</sup>CD68<sup>+</sup> cells, and scale bars represent 50  $\mu$ m (upper panel) and 10  $\mu$ m (lower 2 panels). G and H, n=3 mice per group. B, E and F, each dot is an independent mouse. Results shown here were reproduced at least twice. From here on, Error bars are for SEM.

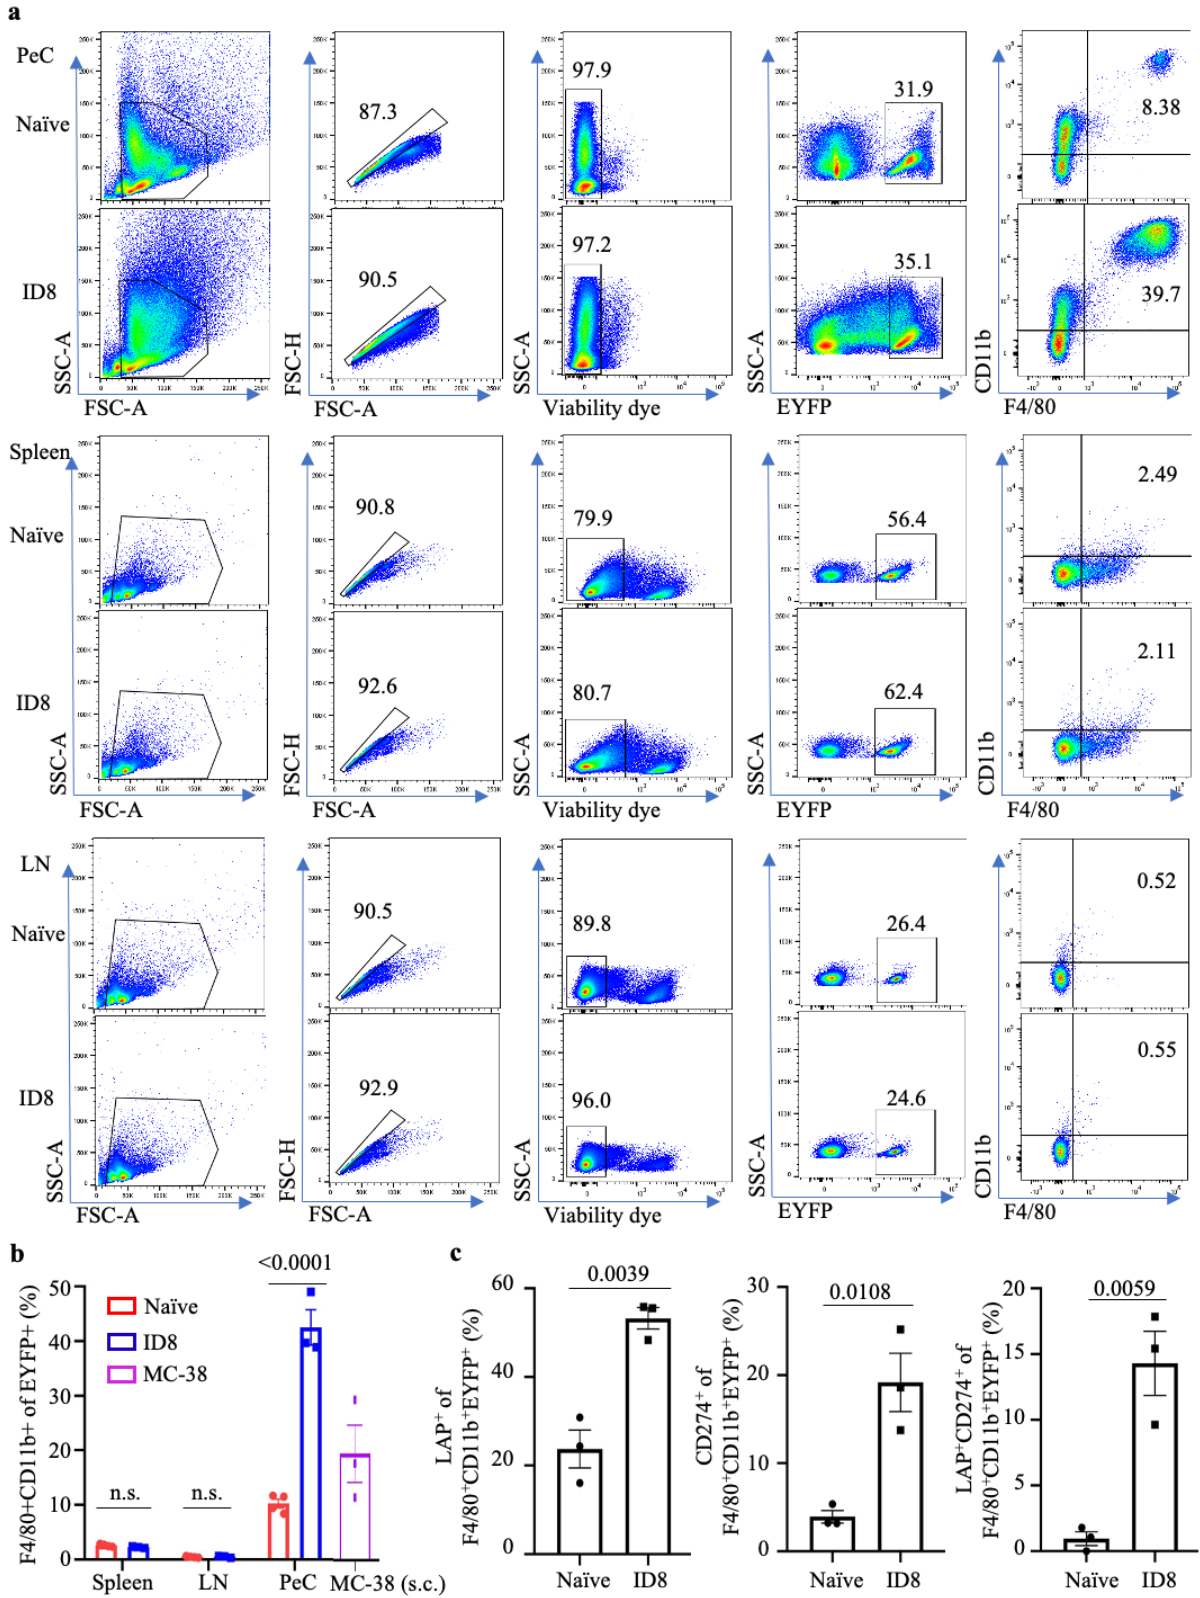

**Supplementary Figure 2. EYFP<sup>+</sup>F4/80<sup>+</sup>CD11b<sup>+</sup> cells in the tumor of naïve and tumor bearing Mb1-EYFP mice. Representative FACS plots (a) and quantification (b) showing**

Mean  $\pm$  SEM of F4/80<sup>+</sup>CD11b<sup>+</sup> of EYFP<sup>+</sup> cells in spleen, LN and PeC ( $P < 0.0001$ ) of Mb1-EYFP mice vs without (naïve) peritoneal ID8 cancer. “MC-38 (s.c.)” is for F4/80<sup>+</sup>CD11b<sup>+</sup> EYFP<sup>+</sup> cells (Mean  $\pm$  SEM) in the tumor of Mb1-EYFP mice with MC38 tumor. (n=4 for naïve group, n=3 for ID8 group and n=3 for MC-38 group).  $P$  values were calculated using two-tailed unpaired  $t$  test. **c**, Quantification of LAP/TGF $\beta$  and PD-L1 expression in F4/80<sup>+</sup>CD11b<sup>+</sup>EYFP<sup>+</sup> cells (Mean  $\pm$  SEM) in the peritoneum of naïve vs ID8 cancer-bearing mice (LAP<sup>+</sup>  $P=0.0039$ , CD274<sup>+</sup>  $P=0.0108$ , and LAP<sup>+</sup>CD274<sup>+</sup>  $P=0.0059$ , n=3/group).  $P$  values were calculated using two-tailed unpaired  $t$  test. Each symbol is an independent mouse.



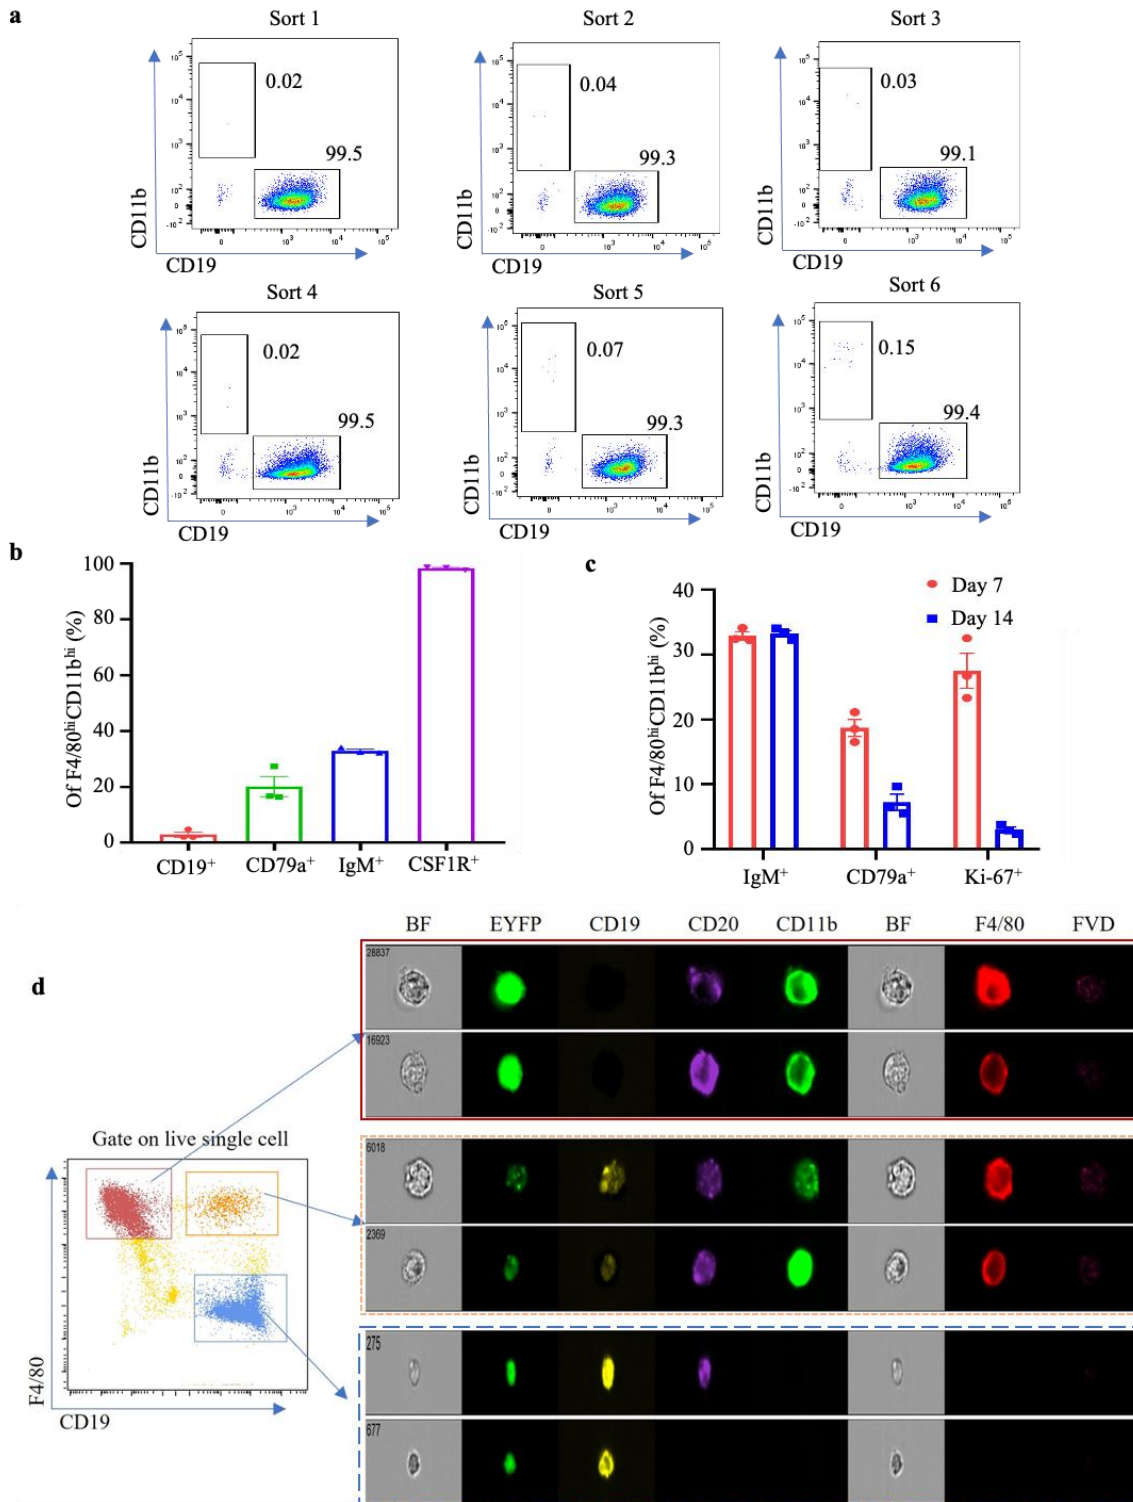

Suppl. Fig.3

e

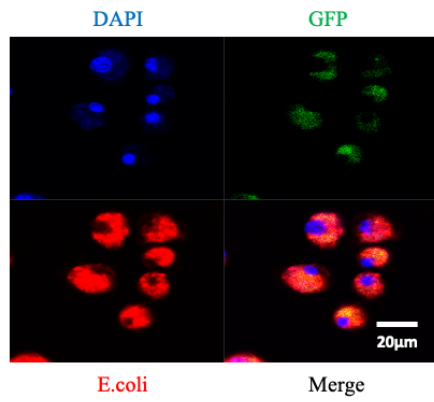

f

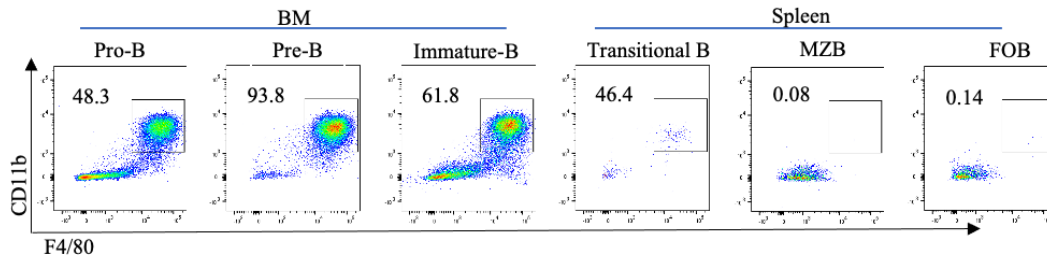

g

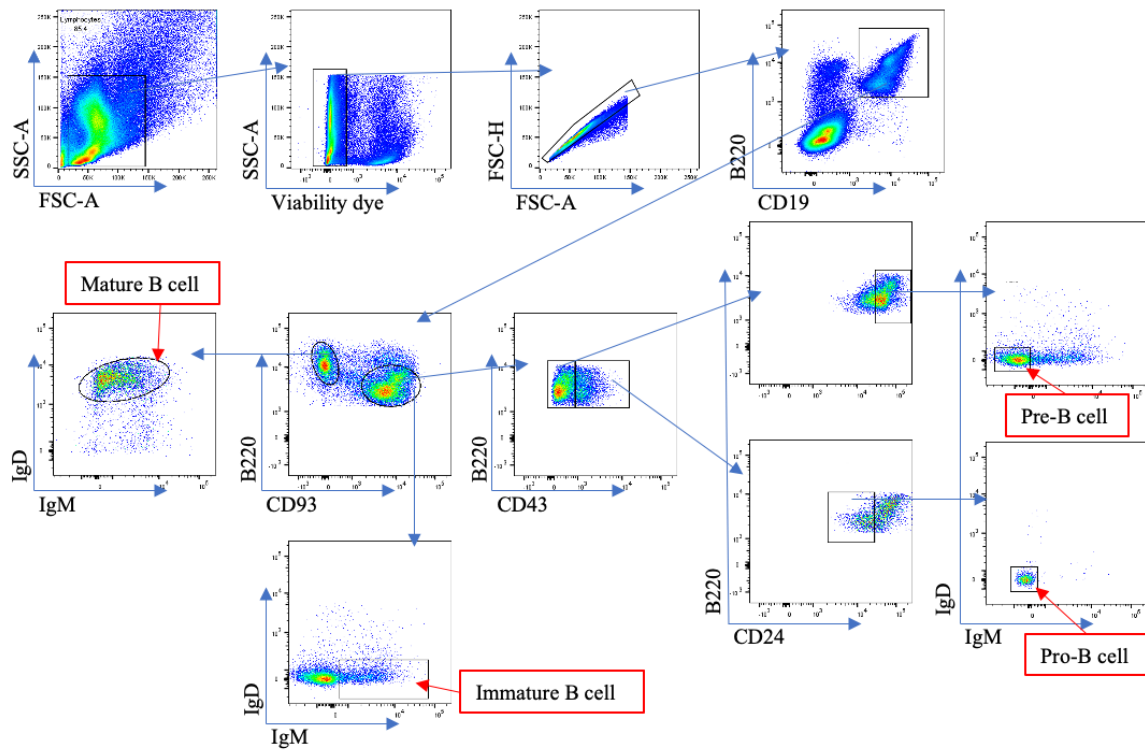

Suppl. Fig.3



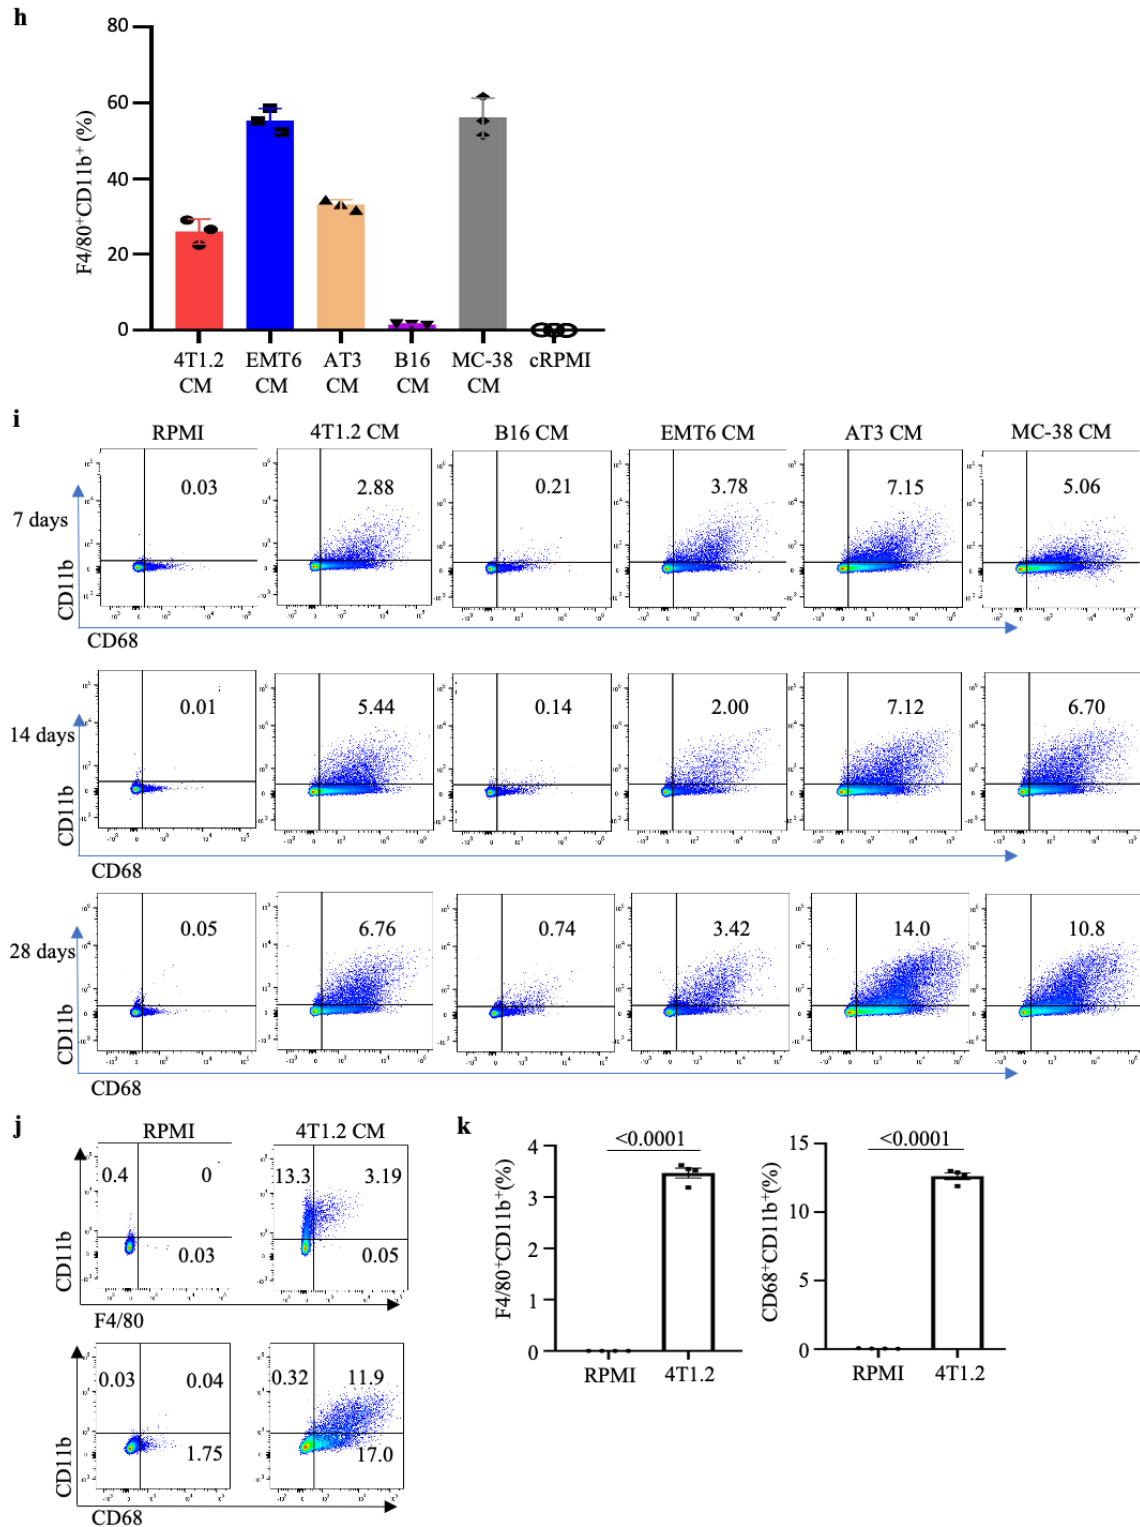

**Supplementary Figure 3. Cancer CM causes differentiation of BM B cells into macrophages.** **a**, representative FACS plots showing the purity (> 99%) of CD19<sup>+</sup> B cells independently FACS-purified from 6 mice (sort 1-6), which we used in the *in vitro* B-MF

conversion assays. **b** and **c**, Quantification of FACS results (Mean  $\pm$  SEM) for indicated expression of markers (X-axis) in F4/80<sup>+</sup>CD11b<sup>+</sup> cells generated from BM B cells cultured in 4T1.2 CM for 7 (n=3, **b**) and 14 days (red, 7 days, and blue, 14 days, n=3/group, **c**). **d**, Representative Imagestream images for expression of EYFP, F4/80, CD11b, CD19, and CD20 in single CD19<sup>+</sup>F4/80<sup>-</sup>, CD19<sup>+</sup>F4/80<sup>+</sup> and CD19<sup>-</sup>F4/80<sup>+</sup> cells (gated and arrows) after incubation of BM B cells of EYFP<sup>+</sup> mice in 4T1.2-CM for 7 days. See that pure B cells (F4/80<sup>-</sup>CD19<sup>+</sup> cells) are smaller in size than F4/80<sup>+</sup> cells. **e**, Immunofluorescent microscopy image showing B-MF generated from RAG2-GFP<sup>+</sup> BM B-cells can phagocytize pHrodo™ red-labeled *E. coli*. Reproduced twice. Scale bar represents 20  $\mu$ m. **f**, Representative FACS plots showing FACS-purified BM B-cell precursors (pro-B and pre-B cells) and immature B cells, but not splenic transitional, marginal zone and follicular B cells, can generate F4/80<sup>+</sup>CD11b<sup>+</sup> cells upon culture with 4T1.2-CM for 7 days. **g**, Gating strategy of FACS-purified BM B-cell subsets used. **h**, Quantification of results shown in Fig2G, showing Mean  $\pm$  SEM of F4/80<sup>+</sup>CD11b<sup>+</sup> cells after culture of BM B cells in cRPMI or CM from 4T1.2, EMT6, AT3, B16-F10, and MC38 cancer cells (n=3 per group). **i**, Representative FACS plots of pre-B cell line 70z/3 cultured for 7, 14, or 28 days with CM from indicated cancer cells. Shows surface upregulation of CD11b and CD68. **j**, Representative FACS plots and **k**, quantification (Mean  $\pm$  SEM, n=4 per group) for surface expression of macrophage markers in 70z/3 cells after 30-day culture in cRPMI vs 4T1.2-CM. *P* values were calculated using two-tailed unpaired *t* test. The results shown here were independently reproduced at least three times.

**a**

BM B cell and monocyte sort gating strategy

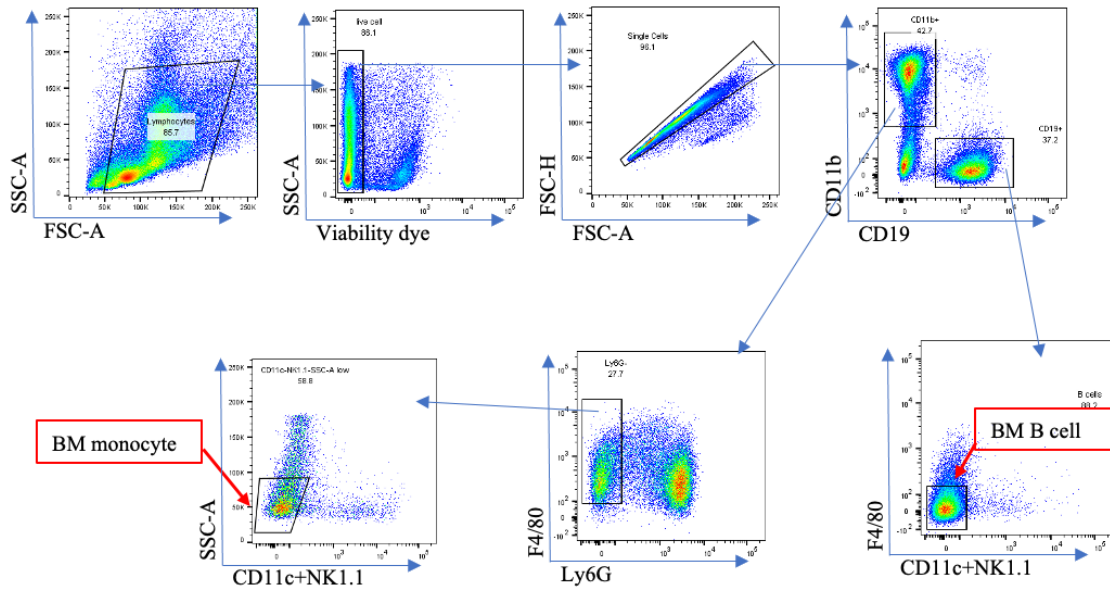

**b**

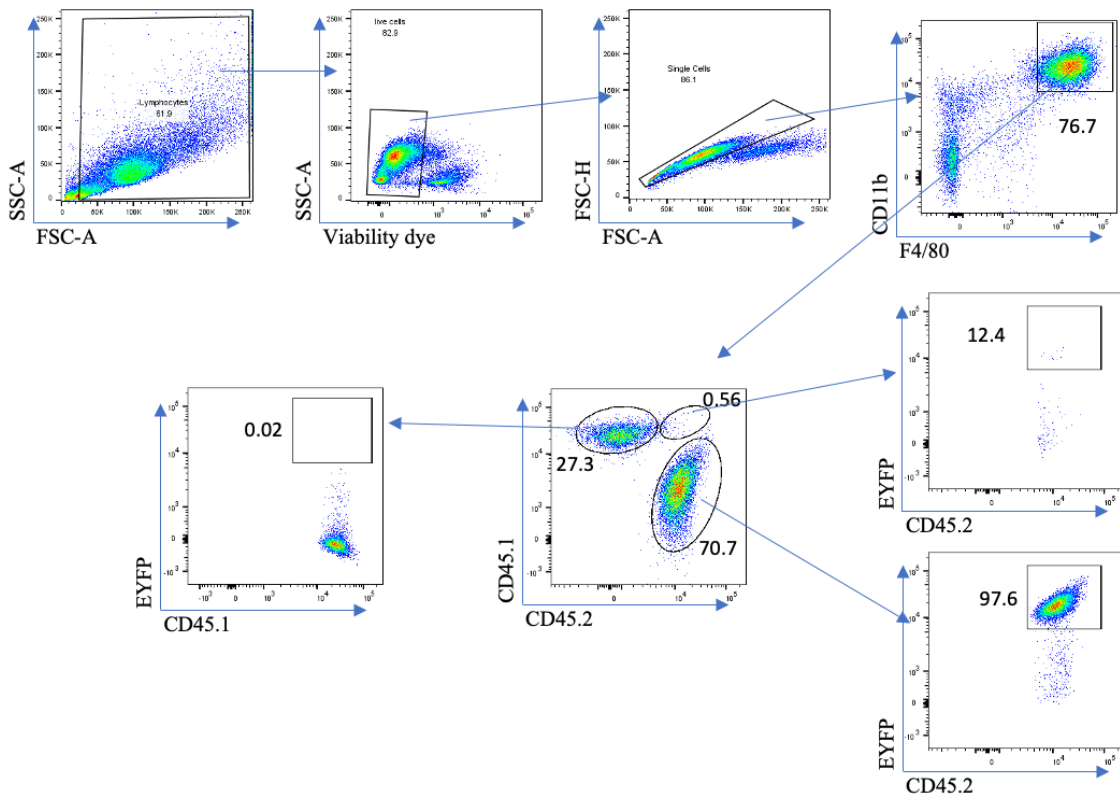

Suppl. Fig.4

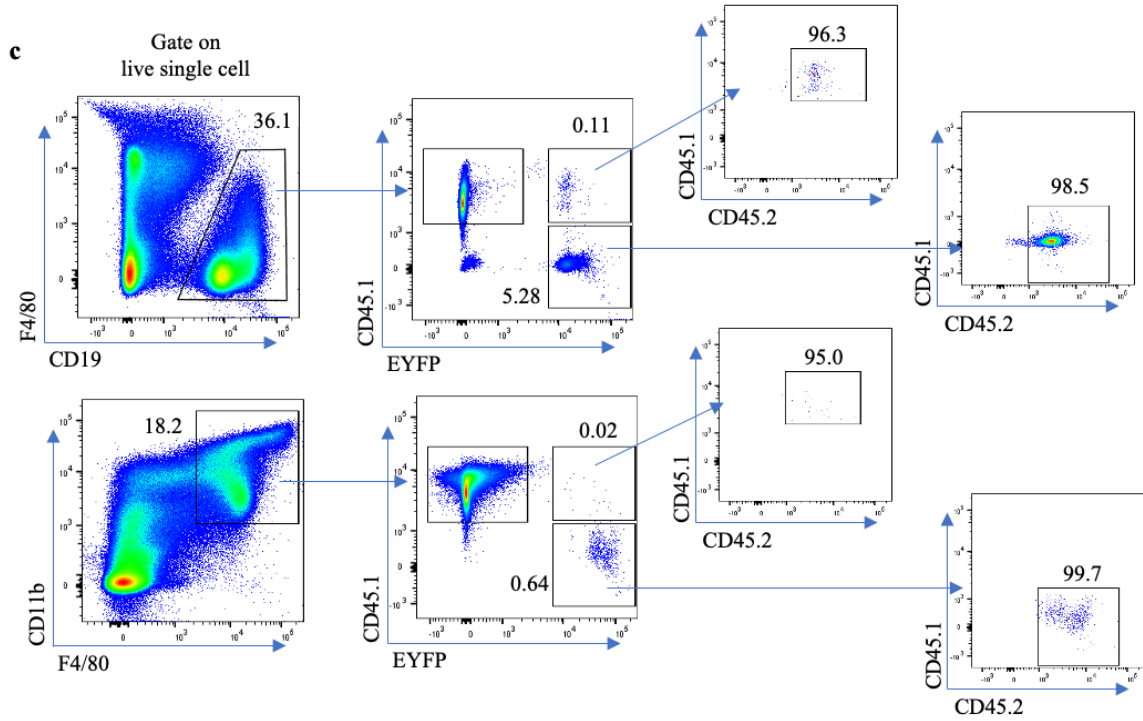

**Supplementary Figure 4. Gating strategy of FACS-sorted cells and cells used in vivo in Fig.2h-j.** **a**, Gating strategy of FACS-sorted BM B cells and monocytes. **b**, Gating strategy of the experiment depicted in Fig 2H. It shows CD45.1<sup>+</sup> and CD45.2<sup>+</sup> F4/80<sup>+</sup>CD11b<sup>+</sup> macrophages after a mixed culture of CD45.1<sup>+</sup> monocytes and EYFP<sup>+</sup>CD45.2<sup>+</sup> BM B cells in 4T1.2-CM. **c**, Gating strategy of the experiment depicted in Fig 2I. It shows EYFP, surface CD45.1 and CD45.2 expression in peritoneal F4/80<sup>+</sup>CD11b<sup>+</sup> (macrophages) and CD19<sup>+</sup> B cells in CD45.1 mice with ID8 cancer. EYFP<sup>+</sup>CD45.2<sup>+</sup> BM B cells were i.p. transferred into CD45.1 mice with ID8 cancer in the peritoneum.

**a**

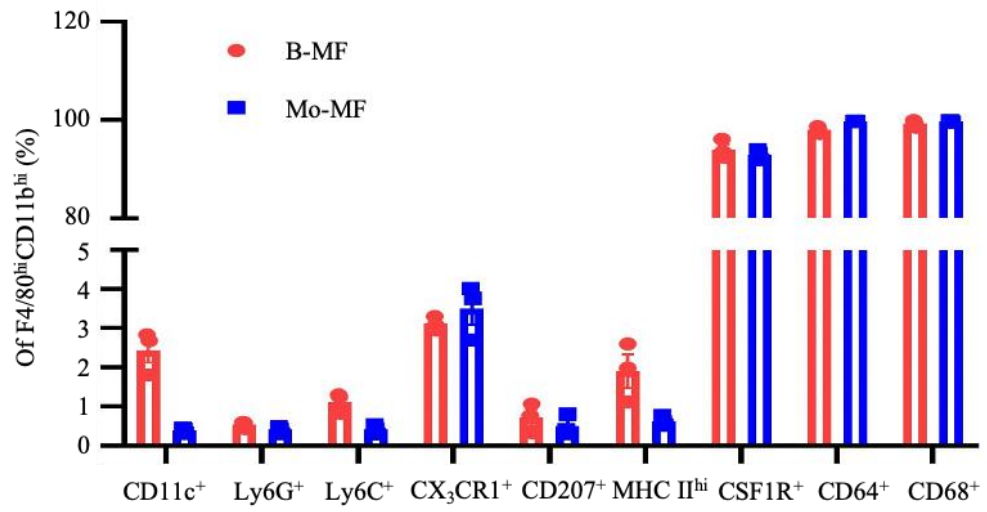

**b**

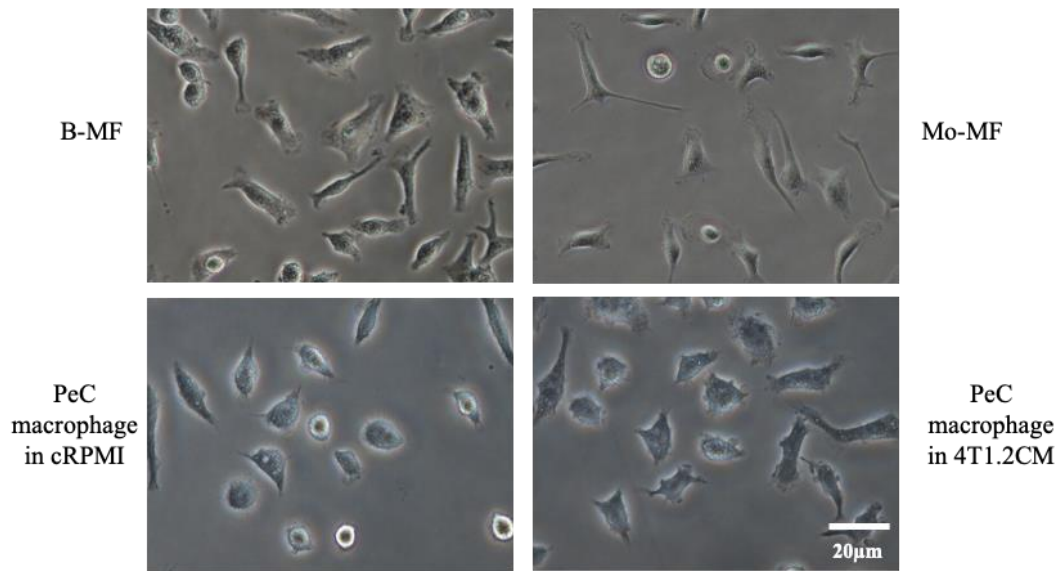

*Suppl. Fig.5*

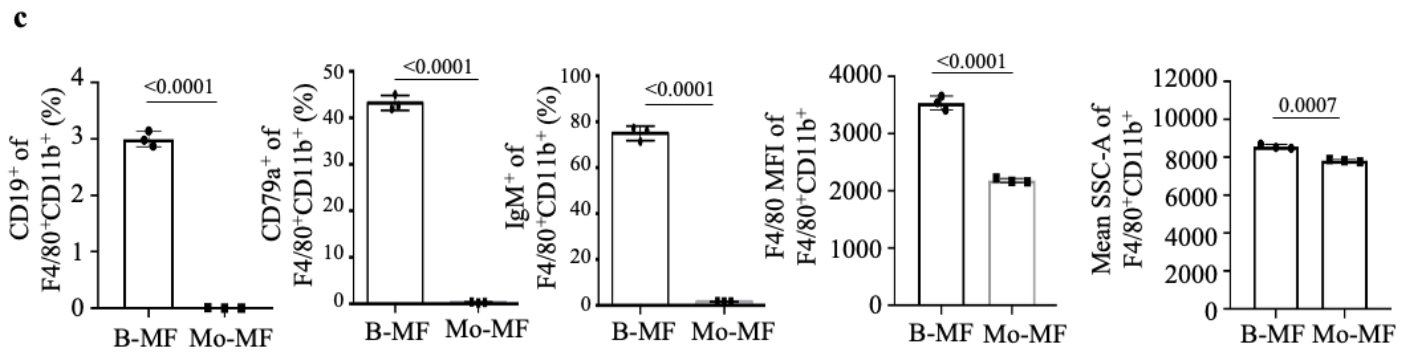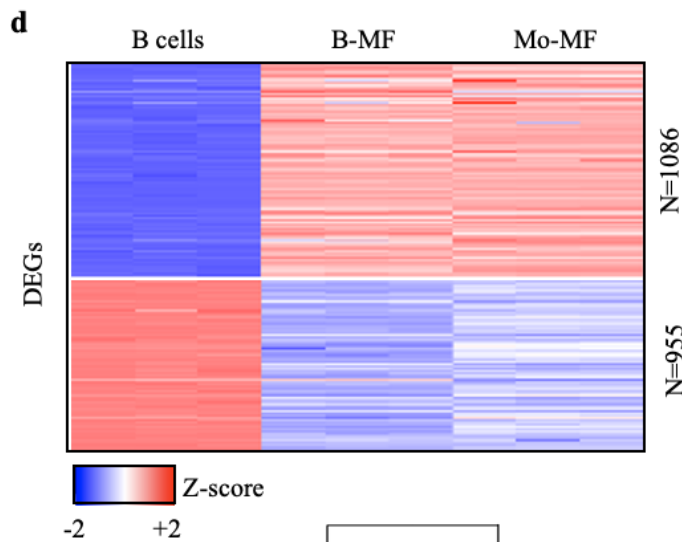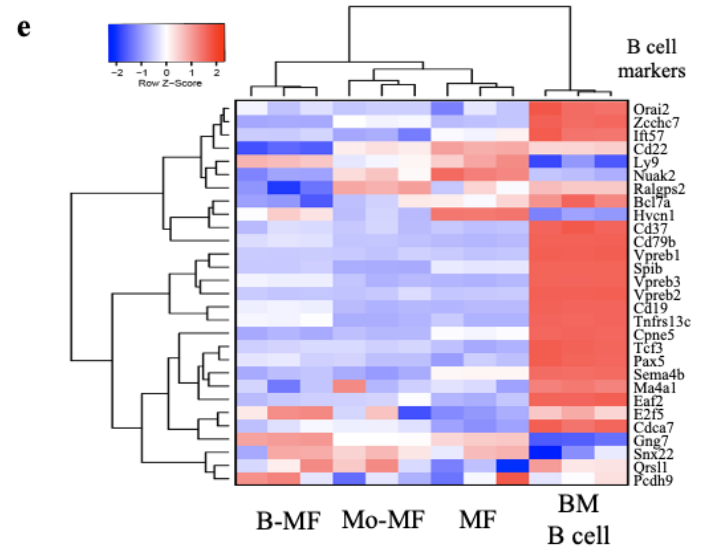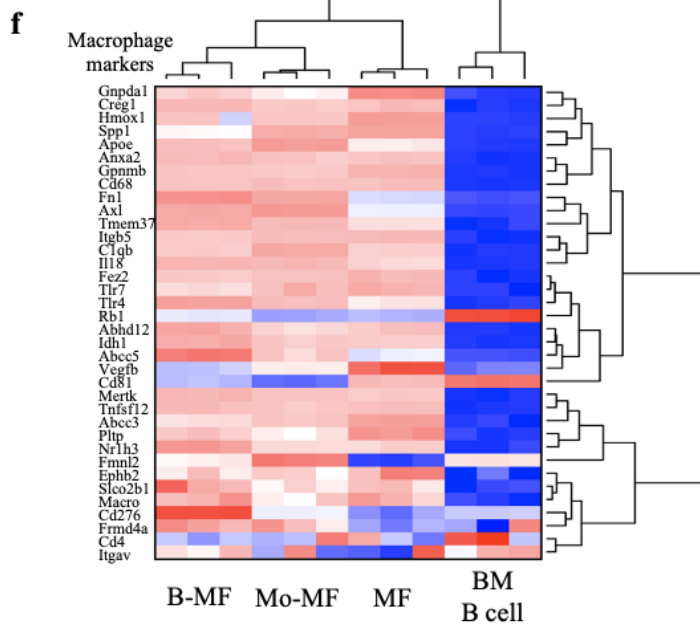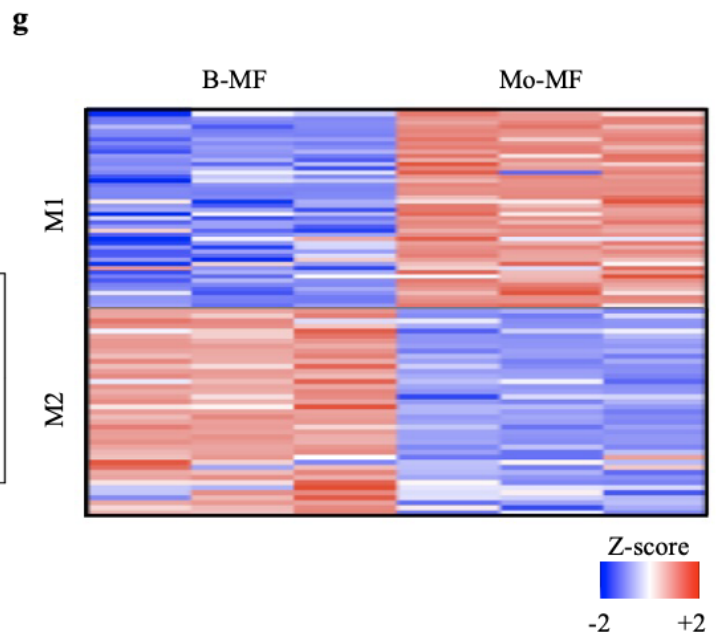



**h**

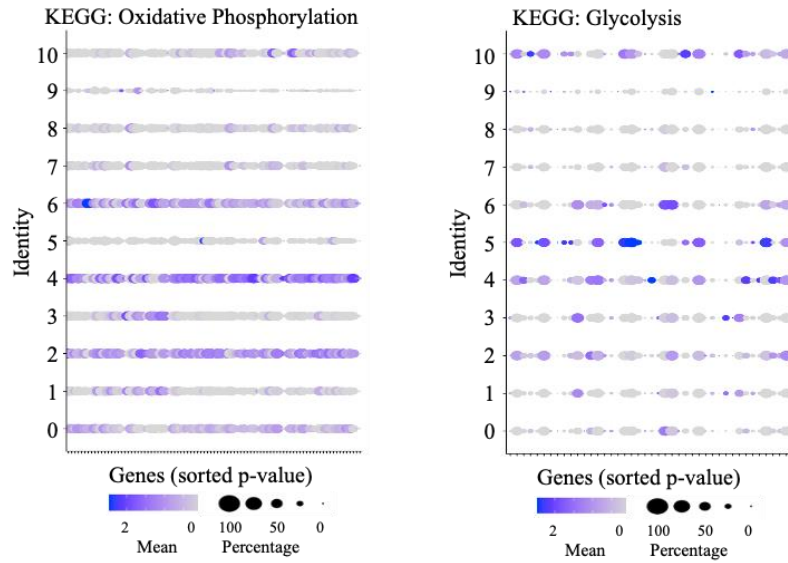

**i**

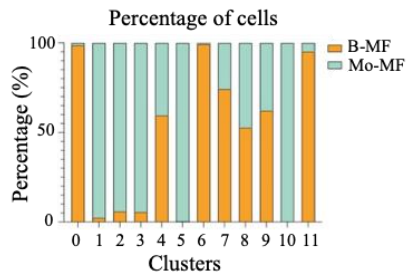

**j**

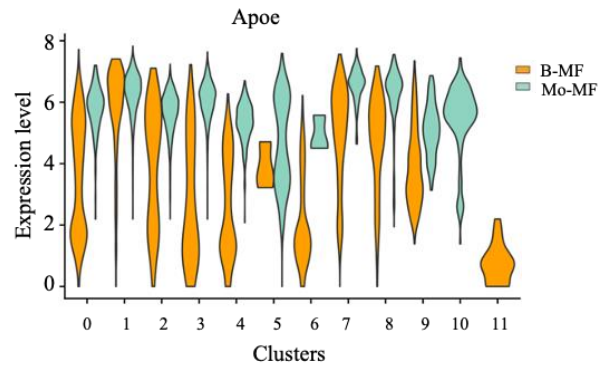

**k**

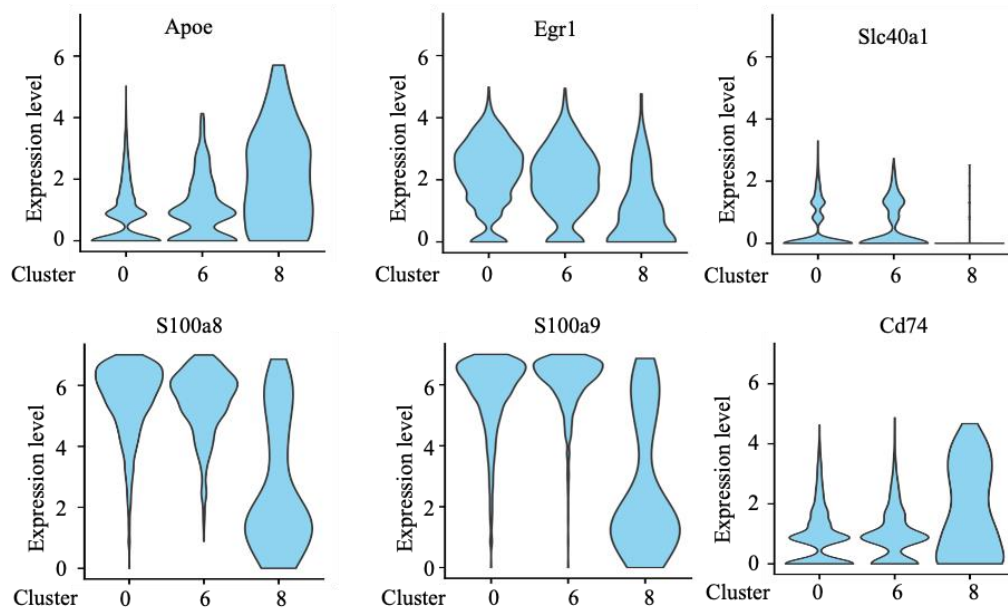

**Supplementary Figure 5. Distinct gene expression profiles of B-MF and Mo-MF. a,**

Quantification of FACS staining shows Mean  $\pm$  SEM expression of indicated markers (X-axis) on the surface of *in vitro* generated F4/80<sup>+</sup>CD11b<sup>+</sup> B-MF vs Mo-MF (CD19<sup>+</sup>  $P$ <0.0001, CD79a<sup>+</sup>  $P$ <0.0001, IgM<sup>+</sup>  $P$ <0.0001, F4/80 MFI  $P$ <0.0001, and Mean SSC-A  $P$ =0.0007, n=3 per group). **b**, Representative light microscopy images showing morphology of *in vitro* generated B-MF and Mo-MF as compared to macrophages from peritoneum (PeC) of naïve mice, which were cultured in cRPMI or 4T1.2-CM. Independently reproduced twice. Scale bar represented 20  $\mu$ m. **c**, *in vitro* generated B-MF differ from Mo-MF. Shown are frequency Mean  $\pm$  SEM of CD19, CD79a and IgM expression and MFI Mean  $\pm$  SEM of F4/80 within F4/80<sup>+</sup> CD11b<sup>+</sup> cells and Mean  $\pm$  SEM of cell sizes (n=3 per group).  $P$  values were calculated using two-tailed unpaired  $t$  test between B-MF vs Mo-MF. **d**, Heatmap showing 2041 differential expressed genes between B cells and macrophages (B-MF and Mo-MF) identified from mRNA expression profiling (microarray). Scale bar is for expression z-score. Heatmap of expression of canonical B-cell (**e**) and macrophage (**f**) genes in B-MF, Mo-MF, peritoneal macrophages (MF) and BM B cells. **g**, Heatmap showing expression of M1 and M2 signature genes (M1/M2 signature genes were from GSE5099) in B-MF and Mo-MF. **h**, KEGG oxidative phosphorylation and glycolysis pathway gene signature in *in vitro* generated B-MF and Mo-MF in scRNA-seq data. **i**, Frequency of B-MF or Mo-MF in the individual cell clusters **j**, Violin plot of *Apoe* expression in the B-MF and Mo-MF among 12 clusters. **k**, Violin plot of expression of *Apoe*, *Egr1*, *Slc40a1*, *S100a8*, *S100a9* and *CD74* in clusters 0, 6, 8 identified from scRNA-seq results of TAM from mice with 4T1.2 cancer.

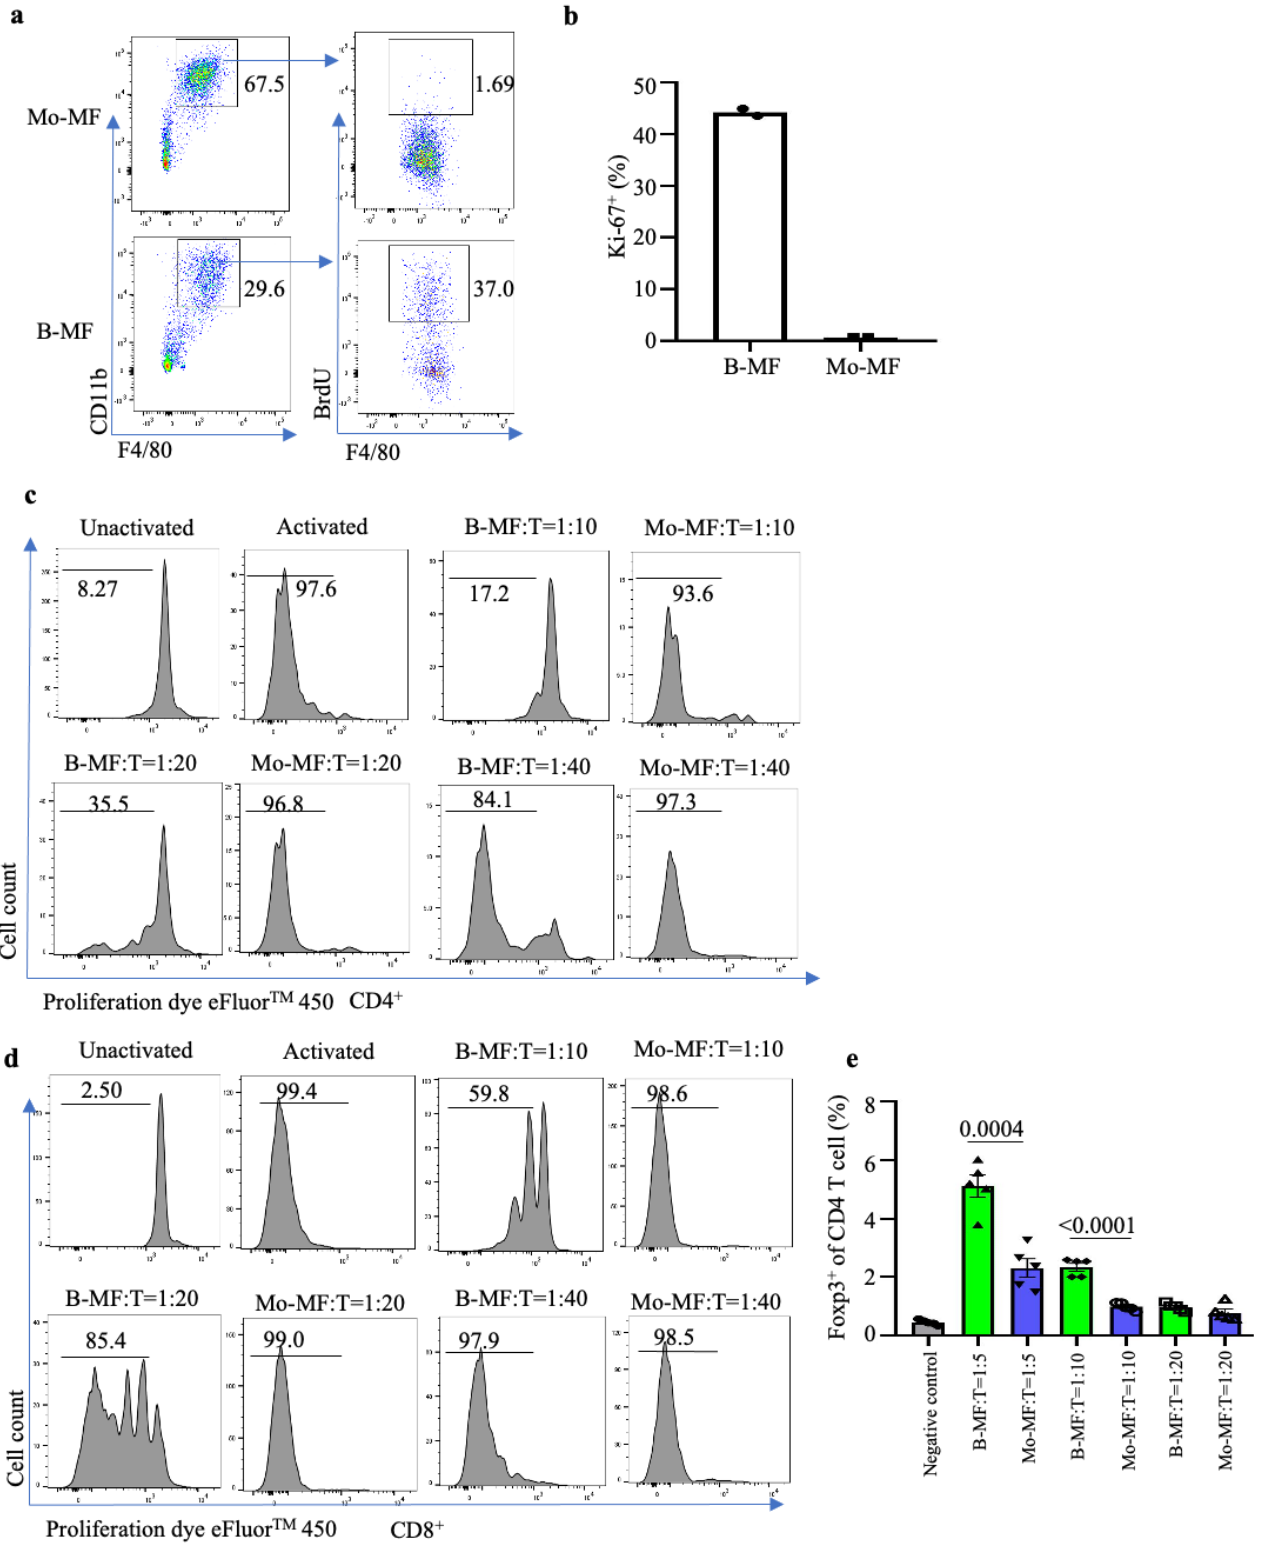

Suppl.Fig.6

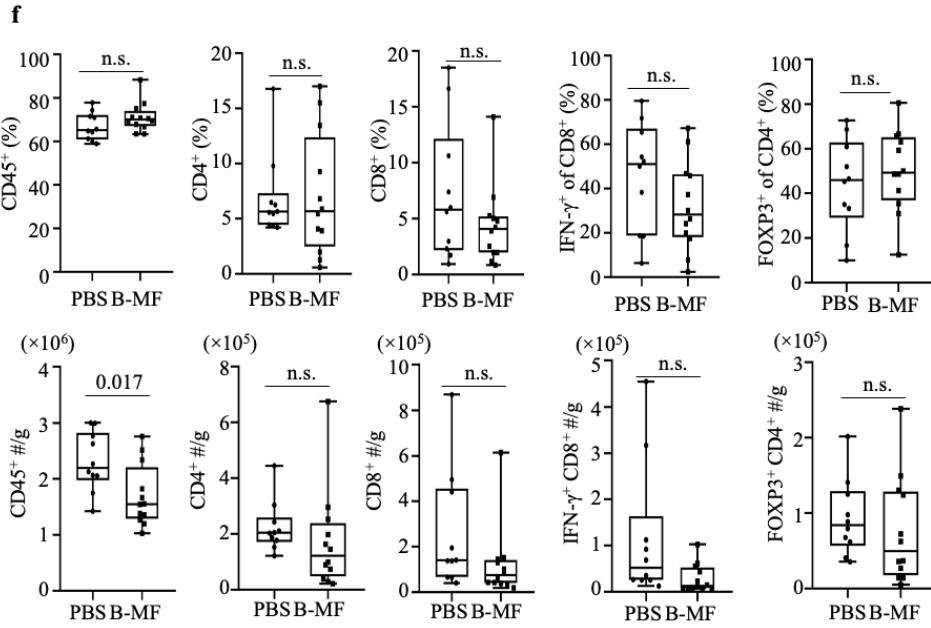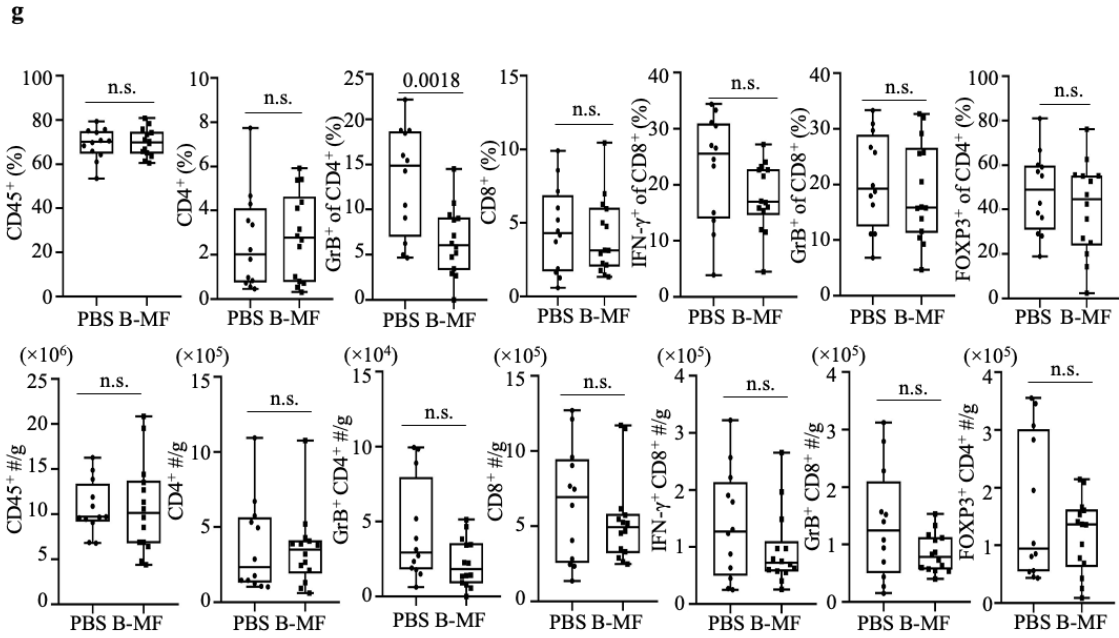

Suppl. Fig.6

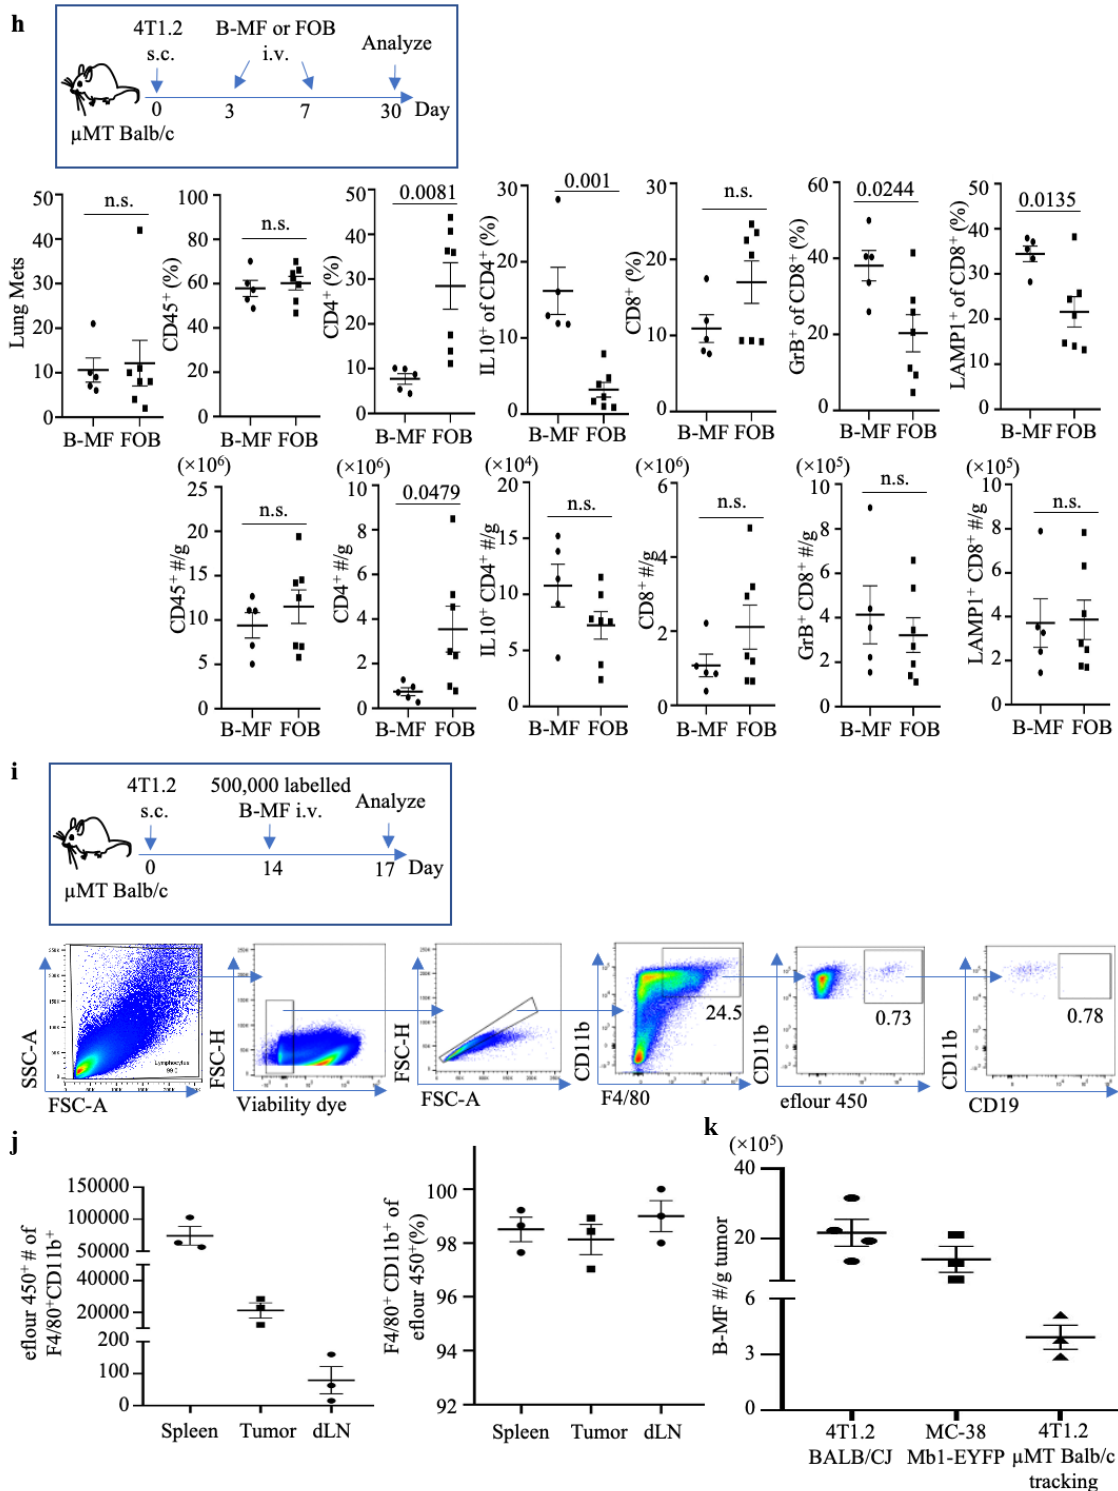

**Supplementary Figure 6. B-MF and Mo-MF are functionally different cells. a,** Representative FACS plots showing BrdU<sup>+</sup> frequency in *in vitro* generated B-MF and Mo-MF after pulsing with BrdU for 24h. **b,** Quantification of Ki-67 expression of *in vitro* generated B-MF and Mo-MF, n=2. **c and d,** Unlike Mo-MF, B-MF suppress proliferation of T cells *in vitro*. Representative histogram showing the proliferation of CD4<sup>+</sup> T cells (**c**)

and CD8<sup>+</sup> T cells (**d**) after B-MF and Mo-MF were cultured with T cells stimulated with anti-CD3/CD28 Abs at 10:1, 20:1 and 40:1 (T cell: MF) ratio for 4 days. **e**, Quantification (Mean  $\pm$  SEM, n=5 per group) of FoxP3<sup>+</sup> Tregs *in vitro*-converted from CD25<sup>-</sup>CD4<sup>+</sup> non-Tregs T cells (isolated from naïve mouse spleen) after 5-day co-culture with B-MF vs Mo-MF at 5:1 ( $P=0.0004$ ), 10:1 ( $P<0.0001$ ) and 20:1 (T cell: MF) ratio.  $P$  values were calculated using two-tailed unpaired  $t$  test. **f** and **g**, Box-Whiskers plot quantification (frequency and absolute numbers) of tumor-infiltrating CD4<sup>+</sup> T cells and CD8<sup>+</sup> T cells within CD45<sup>+</sup> cells and their GrB and IFN- $\gamma$ -expressing cells, and FoxP3<sup>+</sup>CD4<sup>+</sup> T cells in s.c. tumor of  $\mu$ MT C57BL/6 mice with B16-F10 melanoma (n=10 for PBS group, n=12 for B-MF group, CD45<sup>+</sup>#/g  $P=0.017$ , **f**) vs PBS and 4T1.2  $\mu$ MT BALB/c mice (n=12 for PBS group, n=14 for B-MF group, GrB<sup>+</sup>% of CD4<sup>+</sup>  $P=0.0018$ , **g**) vs PBS.  $P$  values were calculated using two-tailed unpaired  $t$  test. Schema of adoptive transfer experiment in  $\mu$ MT BALB/c mice (upper panel, **h**). Equal numbers of *in vitro*-generated B-MF or FACS-purified FOB ( $3 \times 10^5$  cells/mouse) were i.v. injected 3 and 10 days after s.c. challenge with 4T1.2. cancer (n=5 for B-MF group, n=8 for FOB group). Lung metastasis and tumor-infiltrated cells (TIL) were quantified at day 30 (lower panel, **h**). Shown are frequency within CD45<sup>+</sup> cells and absolute numbers of TIL (CD4<sup>+</sup>%  $P=0.0081$ , IL10<sup>+</sup>% of CD4<sup>+</sup>  $P=0.001$ , GrB<sup>+</sup>% of CD8<sup>+</sup>  $P=0.0244$ , LAMP1<sup>+</sup>% of CD8<sup>+</sup>  $P=0.0135$ , CD4<sup>+</sup>#/g  $P=0.0479$ , **h**) after B-MF vs FOB.  $P$  values were calculated using two-tailed unpaired  $t$  test. Schema of B-MF tracking experiment (**i**). eFluor450-labelled B-MF ( $5 \times 10^5$ ) were i.v. injected into  $\mu$ MT BALB/c mice bearing a 14-day 4T1.2 tumor. After 3 days, absolute numbers (Mean  $\pm$  SEM, n=3 per group) of eFluor450<sup>+</sup> in CD11b<sup>+</sup>F4/80<sup>+</sup> were quantified (left panel, **j**) and proportion of CD11b<sup>+</sup>F4/80<sup>+</sup> in eFluor450<sup>+</sup> cells were determined by FACS (right panel, **j**) in indicated tissues and in the tumor. Absolute numbers of transferred eFluor450<sup>+</sup> CD11b<sup>+</sup>F4/80<sup>+</sup> cells per gram tumor was compared with that of B-MF in 4T1.2 tumor in BALB/c mice (CD79a<sup>+</sup>F4/80<sup>+</sup>CD11b<sup>+</sup>CD19<sup>-</sup>) and in MC38 tumor in Mb1-EYFP mice (EYFP<sup>+</sup>F4/80<sup>+</sup>CD11b<sup>+</sup>CD19<sup>-</sup>, **k**). Each symbol in **b** and **e-j** is for independent mouse.



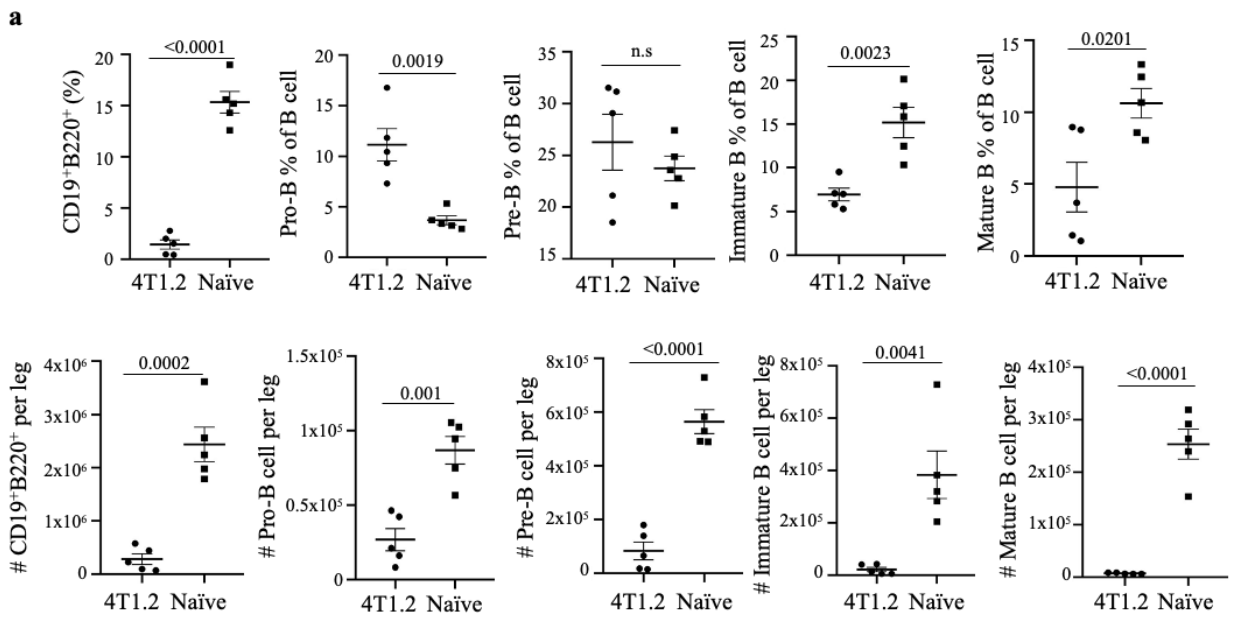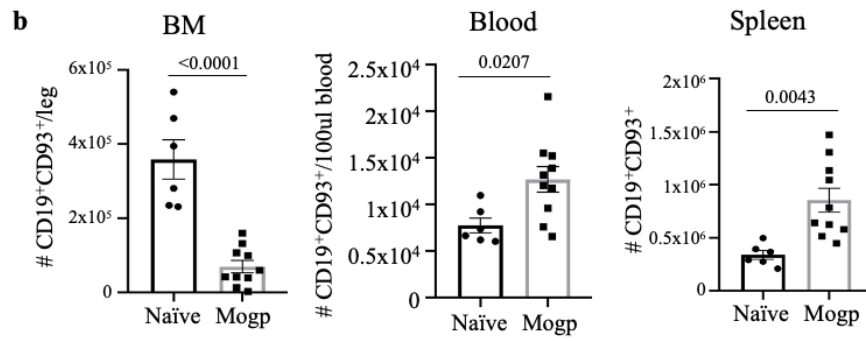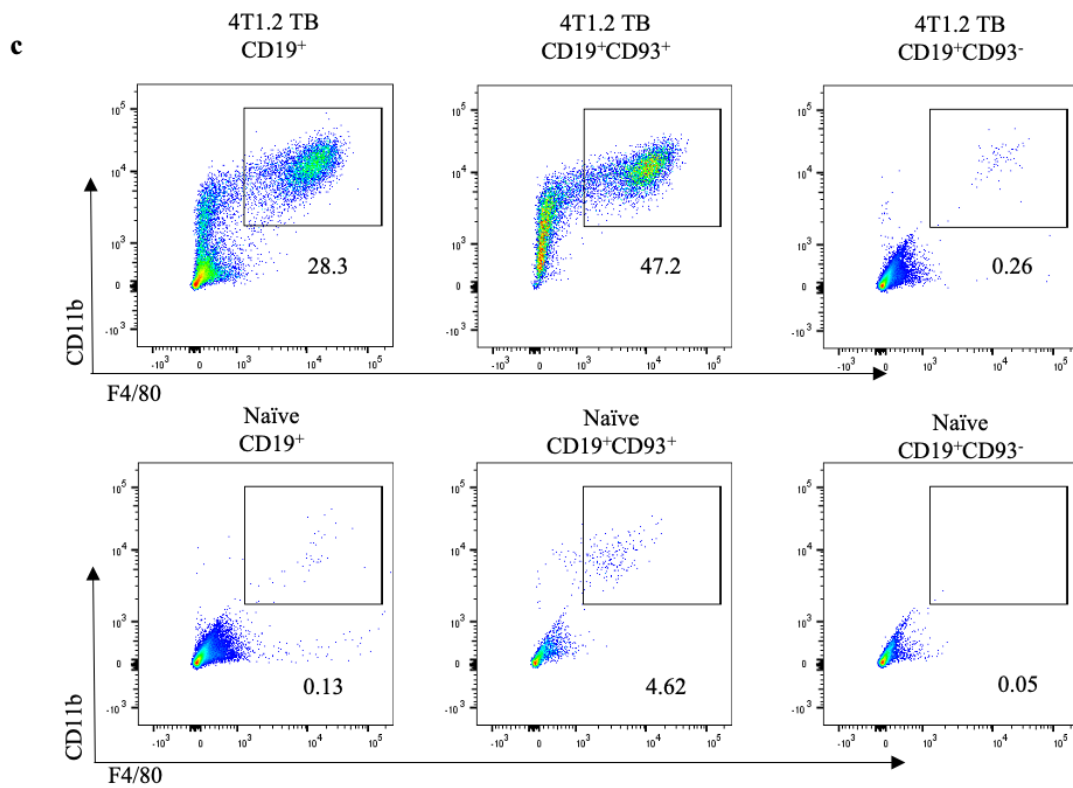

Suppl. Fig.7

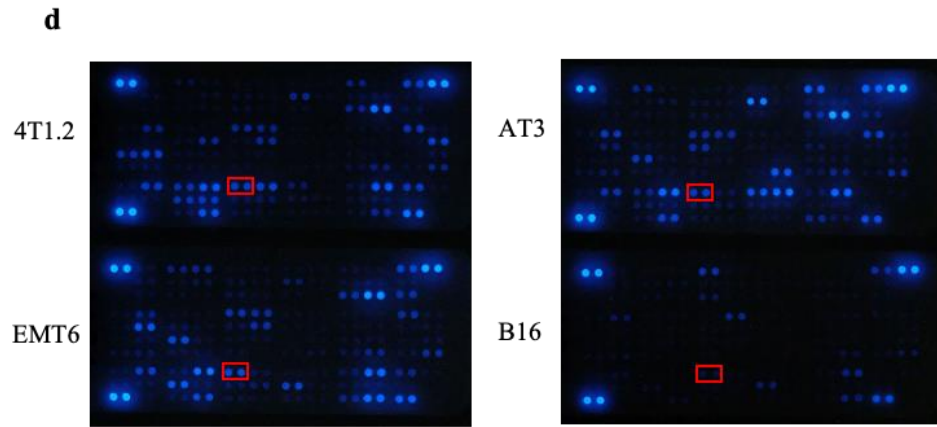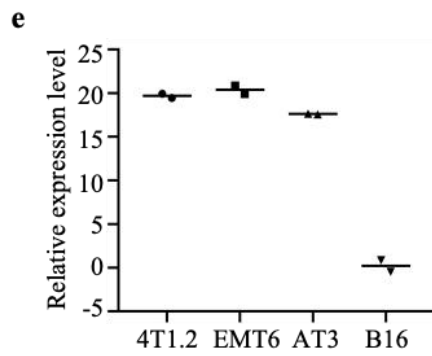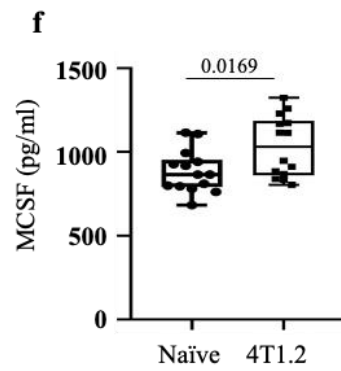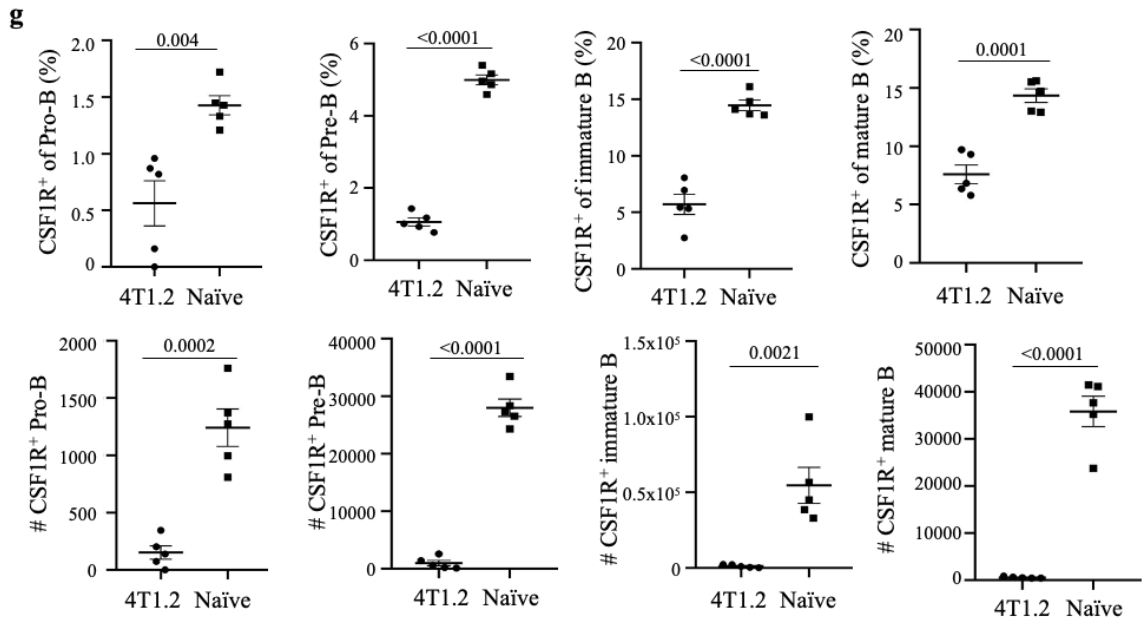

Suppl. Fig.7

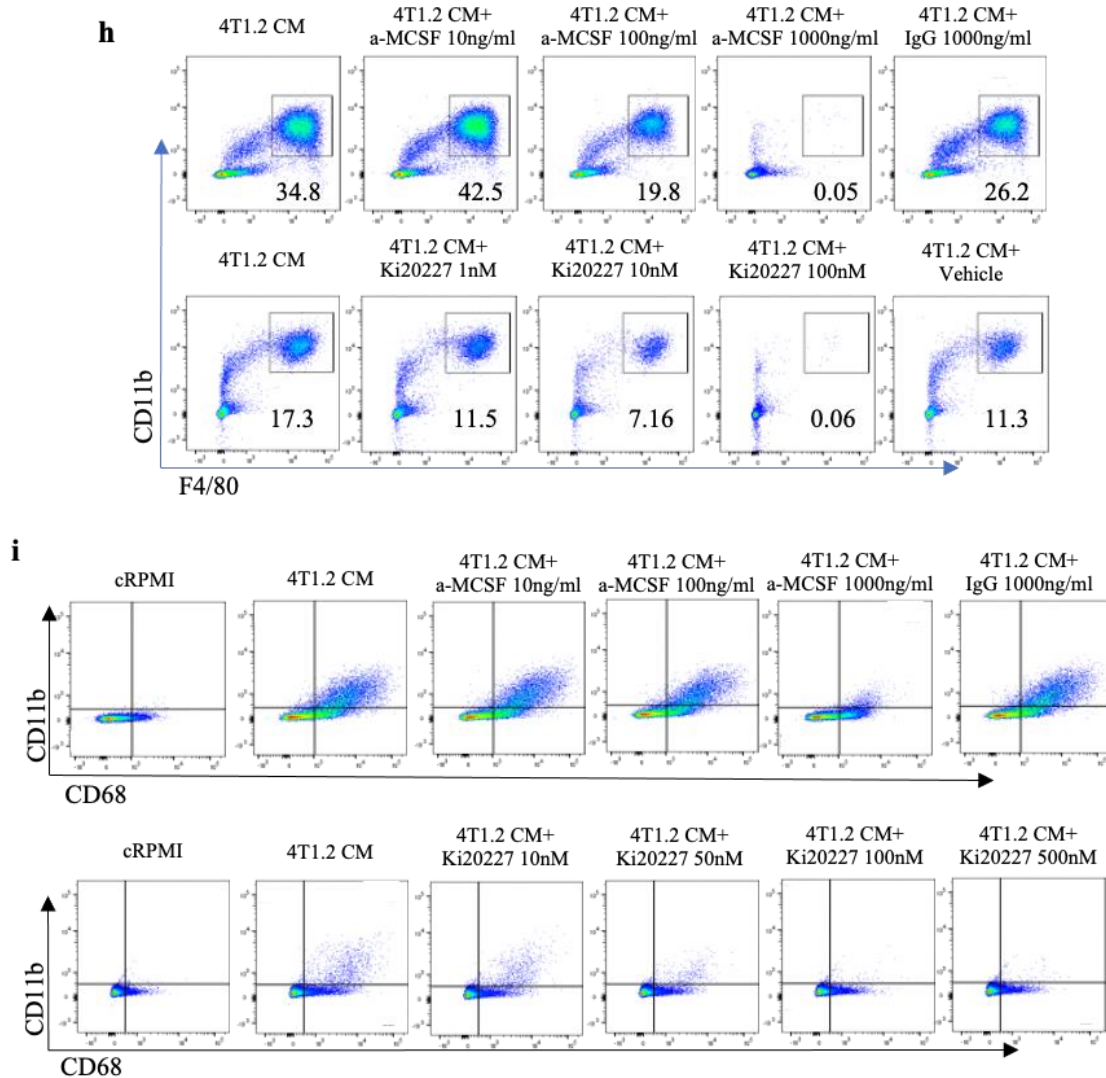

**Supplementary Figure 7. CSF1/CSF1R signaling axis is needed for the generation B-MF.** **a**, Mean  $\pm$  SEM frequency (top) and numbers (bottom) of CD19<sup>+</sup>B220<sup>+</sup> B cells (frequency  $P < 0.0001$ , number  $P = 0.0002$ ) and their subsets (pro-B frequency  $P = 0.0019$  number  $P = 0.001$ , pre-B number  $P < 0.0001$ , immature B frequency  $P = 0.0023$  number  $P = 0.0041$  and mature B cells frequency  $P = 0.0019$  number  $P = 0.001$ ) in BM of mice with 4T1.2 cancer or naïve mice ( $n = 5/\text{group}$ ).  $P$  values were calculated using two-tailed unpaired  $t$  test. **b**, Numbers of B-cell precursors (CD19<sup>+</sup>CD93<sup>+</sup>, Mean  $\pm$  SEM) in BM ( $P < 0.0001$ ), PB ( $P = 0.0207$ ), and spleen ( $P = 0.0043$ ) of mice with Mogp cancer and naïve mice ( $n = 6$  for naïve group,  $n = 10$  for Mogp group).  $P$  values were calculated using two-tailed unpaired  $t$  test. **c**, Representative FACS plots showing F4/80<sup>+</sup>CD11b<sup>+</sup> cells after *in vitro* culture of splenic CD19<sup>+</sup>, CD19<sup>+</sup>CD93<sup>+</sup>, and CD19<sup>+</sup>CD93<sup>-</sup> B cells isolated from mice with 4T1.2 cancer (top) or naïve (bottom) mice in 4T1.2-CM for 7 days. **d** and **e**, Cytokine array image for expression of secreted factors in cancer CM (**d**) and relative levels (Mean) of M-CSF (red boxes in **d**) in CM of 4T1.2, EMT6, AT3 and B16-F10 cells ( $n = 2$  mouse samples per group, **e**). **f**, Box-Whiskers plot amount of MCSF (pg/ml) in sera of naïve and 4T1.2 cancer-bearing mice ( $n = 14/\text{group}$ , ELISA data,  $P = 0.0169$ , **f**).

*P* values in **f** were calculated using two-tailed unpaired *t* test. **g**, Mean  $\pm$  SEM frequency (top) and numbers (bottom) of indicated CSF1R<sup>+</sup> B-cell subsets in BM of mice with 4T1.2 cancer or naïve mice (pro-B frequency *P*=0.004 number *P*=0.0002, pre-B frequency *P*<0.0001 number *P*<0.0001, immature B frequency *P*<0.0001 number *P*=0.0021 and mature B cells frequency *P*=0.0001 number *P*<0.0001, n=5/group). *P* values were calculated using two-tailed unpaired *t* test. **h** and **i**, anti-MCSF Ab or Ki20227 (a specific *c-fms*/CSF1R inhibitor) inhibits ability of 4T1.2-CM to generate B-MF from of BM B-cell precursors (**h**) and 70z/3 cells (**i**) in dose-dependent manner. Numbers in dot plots are for % of CD11b<sup>+</sup>F/80<sup>+</sup> cells. **a-c** and **g-i** were independently reproduced at least three times.

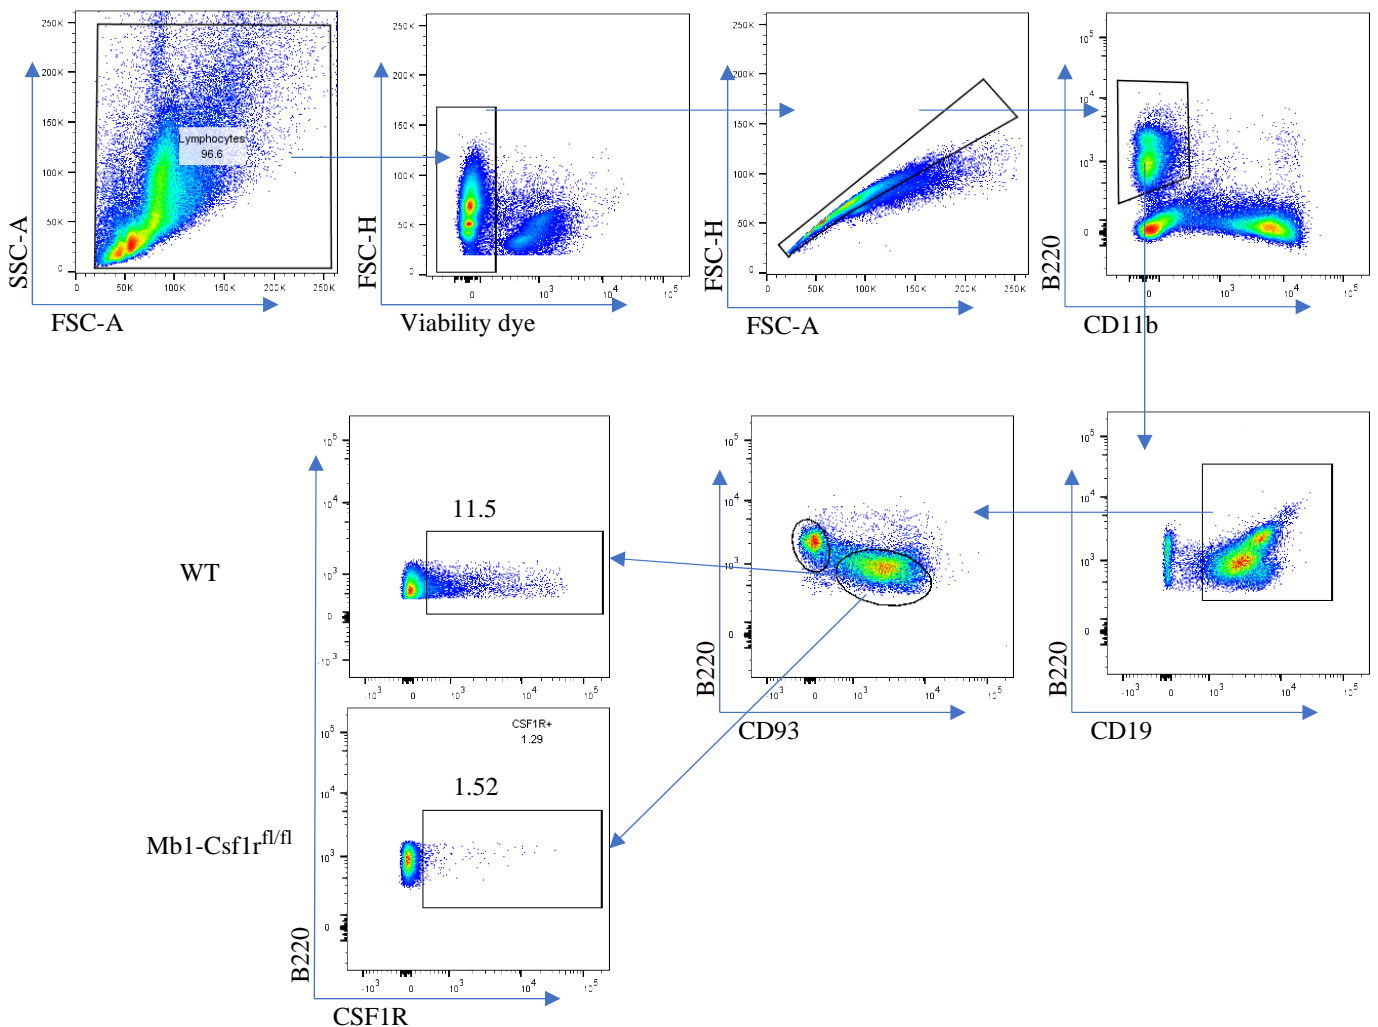

**Supplementary Figure 8.** Gating strategy for data presented in Fig.5F, G, showing surface CSF1R expression in BM CD93<sup>+</sup>CD19<sup>+</sup> B-cell precursors of Mb1-CSF1R<sup>Flx/Flx</sup> (bottom) and littermate Mb1-Cre (WT, top) mice. Numbers in the pots are for expression frequency of CSF1R (%) in the gated areas.

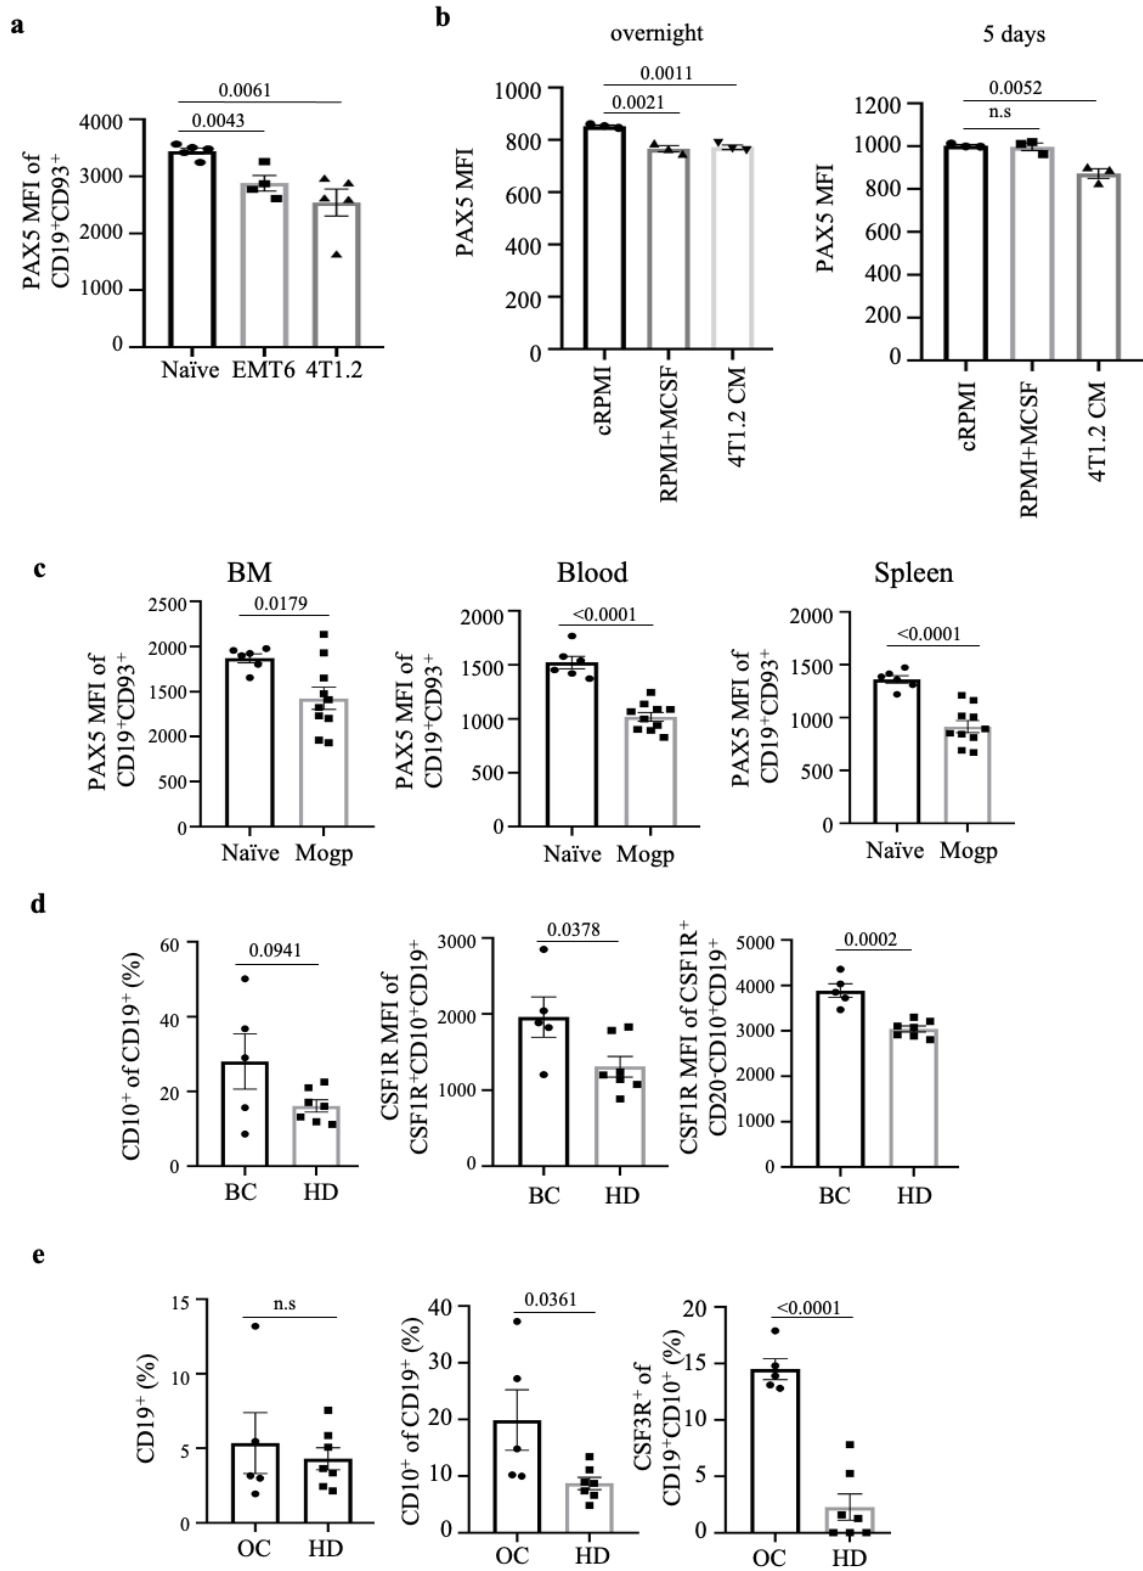

**Supplementary Figure 9. Cancers induce PAX5 downregulation in B-cell precursors.** **a**, FACS evaluation of Pax5 (MFI Mean  $\pm$  SEM) in PB CD19<sup>+</sup>CD93<sup>+</sup> B cells from naïve mice and mice with EMT6 and 4T1.2 cancers (n=5 for naïve group, n=4 for

EMT6 group and  $n=5$  for 4T1.2 group,  $P=0.0043$  naïve vs EMT6 and  $P=0.0061$  naïve vs 4T1.2).  $P$  values were calculated using two-tailed unpaired  $t$  test. **b**, Expression of Pax5 (MFI Mean  $\pm$  SEM) in 70z/3 cells after treatment with M-CSF or 4T1.2-CM ( $n=3$ /group) for overnight ( $P=0.0021$  cRPMI vs RPMI+MCSF and  $P=0.0011$  cRPMI vs 4T1.2 CM, left) or 5 days ( $P=0.0052$  cRPMI vs 4T1.2 CM, right).  $P$  values were calculated using two-tailed unpaired  $t$  test. **c**, Pax5 (MFI Mean  $\pm$  SEM) in B-cell precursors ( $CD19^+CD93^+$ ) from BM( $P=0.0179$ ), PB( $P<0.0001$ ) and spleen( $P<0.0001$ ) from mice with Mogp cancer and naïve mice ( $n=6$  for naïve group,  $n=10$  for Mogp group).  $P$  values were calculated using two-tailed unpaired  $t$  test. **d** and **e**, FACS evaluation of PB cells of breast cancer patients ( $n=5$ ) and healthy human donors ( $n=7$ ).  $P$  values were calculated using two-tailed unpaired  $t$  test. **d**, Mean  $\pm$  SEM frequency of CD10 expression in  $CD19^+$  B cells( $P=0.0941$ ) and CSF1R expression in  $CD19^+CD10^+$  ( $P=0.0378$ ) and  $CD19^+CD10^+CD20^-$  B cells( $P=0.0002$ ); and **e**,  $CD19^+$  cells and CD10 expression in  $CD19^+$  cells( $P=0.0361$ ) and CSF3R expression in  $CD19^+CD10^+$  cells( $P<0.0001$ ) in PB of ovarian cancer patients and healthy donors.  $P$  values were calculated using two-tailed unpaired  $t$  test.



**Supplementary Table 1. List of antibodies used in the study**

| Antibody                | Clone     | Species reactivity | Catalog # | Company   |
|-------------------------|-----------|--------------------|-----------|-----------|
| CD19-PE                 | 1D3       | Mouse              | 152408    | BioLegend |
| CD19-APC                | 1D3       | Mouse              | 152410    | BioLegend |
| CD19-BUV421             | HIB19     | Human              | 302234    | BioLegend |
| F4/80-APC               | BM8       | Mouse              | 123116    | BioLegend |
| F4/80-BV421             | BM8       | Mouse              | 123137    | BioLegend |
| CD11b-BV510             | M1/70     | Mouse/Human        | 101263    | BioLegend |
| CD11b-FITC              | M1/70     | Mouse/Human        | 101206    | BioLegend |
| CD64-PE/Dazzle 594      | X54-5/7.1 | Mouse              | 139319    | BioLegend |
| CX3CR1-PerCP/Cyanine5.5 | SA011F11  | Mouse              | 149009    | BioLegend |
| CD68-BV421              | FA-11     | Mouse              | 137017    | BioLegend |
| CD93-APC                | AA4.1     | Mouse              | 136510    | BioLegend |
| CSF1R-PE                | AFS98     | Mouse              | 135505    | BioLegend |
| CSF1R-PE/Cyanine7       | AFS98     | Mouse              | 135524    | BioLegend |
| IgM-PE/Cyanine7         | RMM-1     | Mouse              | 406514    | BioLegend |
| IgD-BV510               | 11-26c.2a | Mouse              | 405723    | BioLegend |
| CD20-BV421              | SA275A11  | Mouse              | 150405    | BioLegend |
| CD20-APC                | 2H7       | Human              | 302310    | BioLegend |
| CD10-PE                 | HI10a     | Human              | 312204    | BioLegend |
| CD79a-PE                | F11-172   | Mouse              | 133103    | BioLegend |
| TER119-Biotin           | TER-119   | Mouse              | 116204    | BioLegend |
| CD11b-Biotin            | M1/70     | Mouse/Human        | 101204    | BioLegend |
| Gr-1-Biotin             | RB6-8C5   | Mouse              | 108404    | BioLegend |
| CD3 $\epsilon$ -Biotin  | 145-2C11  | Mouse              | 100304    | BioLegend |
| NK1.1-Biotin            | PK136     | Mouse              | 108704    | BioLegend |
| CD49b-Biotin            | HMA2      | Mouse              | 103522    | BioLegend |
| CD49b-Biotin            | DX5       | Mouse              | 108904    | BioLegend |
| Ly6C-Biotin             | HK1.4     | Mouse              | 128004    | BioLegend |
| Ly6C-FITC               | HK1.5     | Mouse              | 128005    | BioLegend |
| Ly6G-Biotin             | 1A8       | Mouse              | 127604    | BioLegend |
| Ly6g-BV650              | 1A9       | Mouse              | 127641    | BioLegend |
| CD11c-Biotin            | N418      | Mouse              | 117304    | BioLegend |
| CD11c-BV510             | N419      | Mouse              | 117353    | BioLegend |
| CD117-Biotin            | 2B8       | Mouse              | 105804    | BioLegend |

|                           |             |            |          |            |  |
|---------------------------|-------------|------------|----------|------------|--|
| Alexa Fluor® 488          |             |            |          |            |  |
| Streptavidin              | -           | -          | 405235   | BioLegend  |  |
| I-A/I-E-PerCP/Cyanine5.5  | M5/114.15.2 | Mouse      | 107626   | BioLegend  |  |
| CD206-FITC                | C068C2      | Mouse      | 141704   | BioLegend  |  |
| CD207-PE/Cyanine7         | 4C7         | Mouse      | 144209   | BioLegend  |  |
|                           |             | Mouse/Huma |          |            |  |
| B220-FITC                 | RA3-6B2     | n          | 103206   | BioLegend  |  |
| IgM-PE/Dazzle™ 594        | RMM-1       | Mouse      | 406530   | BioLegend  |  |
| CD93-PE                   | AA4.1       | Mouse      | 136504   | BioLegend  |  |
| CD43-APC                  | S11         | Mouse      | 143208   | BioLegend  |  |
| CD24-BV605                | M1/69       | Mouse      | 101827   | BioLegend  |  |
| CD274-PE/Cyanine7         | 10F.9G2     | Mouse      | 124314   | BioLegend  |  |
| LAP-PerCP/Cyanine5.5      | TW7-16B4    | Mouse      | 141410   | BioLegend  |  |
| CD4-PerCP/Cyanine5.5      | GK1.5       | Mouse      | 100434   | BioLegend  |  |
| CD8a-FITC                 | 53-6.7      | Mouse      | 100706   | BioLegend  |  |
| IFN-γ-APC                 | XMG1.2      | Mouse      | 505810   | BioLegend  |  |
|                           |             | Mouse/Huma |          |            |  |
| PAX5-Alexa Fluor® 488     | 1H9         | n          | 562816   | BD         |  |
| CD71-BV605                | C2          | Mouse      | 563013   | BD         |  |
| CD124-BV421               | Mil4R-M1    | Mouse      | 564086   | BD         |  |
| CD366-BV421               | 5D12        | Mouse      | 747626   | BD         |  |
| CD19-BUV395               | 1D3         | Mouse      | 563557   | BD         |  |
|                           |             | Mouse/     |          |            |  |
| CD11b-BUV395              | M1/70       | Human      | 565976   | BD         |  |
|                           |             | Mouse/     |          |            |  |
| CD11b-BV786               | M1/70       | Human      | 740861   | BD         |  |
| CSF1R-BB515               | 9-4D2-1E4   | Human      | 565346   | BD         |  |
| LDLR-BUV805               | C7          | Human      | 748950   | BD         |  |
| CSF3R-BUV395              | LMM741      | Human      | 743524   | BD         |  |
|                           |             |            | 12-8898- | eBioscienc |  |
| Granzyme B-PE/Cyanine7    | NGZB        | Mouse      | 82       | e          |  |
|                           |             |            | 12-5773- | eBioscienc |  |
| FOXP3-PE                  | FJK-16s     | Mouse      | 82       | e          |  |
|                           |             | Mouse/Huma | 48-5698- | eBioscienc |  |
| Ki67-eFluor 450           | SolA15      | n          | 82       | e          |  |
|                           |             |            | 61-0689- | eBioscienc |  |
| CD68-PE-eFluor 610        | Y1/82A      | Human      | 42       | e          |  |
| Anti-CD19                 | rabbit      |            | ab24523  |            |  |
| antibody[EPR23174-145]    | monoclonal  | Mouse      | 5        | abcam      |  |
|                           | Rat         |            |          |            |  |
| Anti-CD68 antibody[FA-11] | monoclonal  | Mouse      | ab53444  | abcam      |  |
