# Supplementary material for: Cancer co-opts differentiation of B-cell precursors into macrophage-like cells
Source: PubMed Central journal article supplement (PMC9474882; doi:10.1038/s41467-022-33117-y), 2022-09-14
Supplement: 41467_2022_33117_MOESM3_ESM.pdf [file 41467_2022_33117_MOESM3_ESM.pdf]

## **Description of Additional Supplementary Files**

File Name: Supplementary Data 1

Description: Differential expression of genes of in vitro generated B-MF (BBCM4TCM) as compared to BM B cells culture in B-cell medium. Microarray data.

File Name: Supplementary Data 2

Description: Differential expression of genes of in vitro generated B-MF (BBCM4TCM) as compared to monocyte-derived macrophages. Microarray data.

File Name: Supplementary Data 3

Description: Unique scRNA-seq transcription profile of B-MF as compared to Mo-MF.
